# Supplementary material for: Phylogeny and historical biogeography of leafhopper subfamily Evacanthinae (Hemiptera: Cicadellidae) based on morphological and molecular data
Source: PubMed Central journal article supplement (PMC5377372; doi:10.1038/srep45387), 2017-04-03
Supplement: srep45387-s1.pdf [file srep45387-s1.pdf]

# Phylogeny and historical biogeography of leafhopper subfamily Evacanthinae (Hemiptera: Cicadellidae) based on morphological and molecular data

YANG WANG<sup>1</sup>, CHRISTOPHER H. DIETRICH<sup>2</sup> & YALIN ZHANG<sup>1,\*</sup>

<sup>1</sup>*Key Laboratory of Plant Protection Resources and Pest Management, Ministry of Education, Entomological Museum, Northwest A&F University, Yangling, Shaanxi 712100, China*

<sup>2</sup>*Illinois Natural History Survey, Prairie Research Institute, University of Illinois, 1816 S Oak St., Champaign, Illinois 61820, USA*

\*Corresponding authors. E-mail: [yalinzh@nwafu.edu.cn](mailto:yalinzh@nwafu.edu.cn)

## **Supplementary Text S1.** Characters and states for the analysis in this study.

### Colour

1. Dorsal coloration: (0) mostly pale green, orange, yellow or white; (1) mostly dark brown or black. Taxa scored as state 0 often vary among the colours indicated depending on the state of preservation of the specimen.
2. Body shape: (0) flat; (1) cylindrical.

### Head

3. Length of head: (0) shorter than pronotum; (1) about same as pronotum; (2) longer than pronotum; (3) equal to or longer than pronotum and scutellum together.
4. Coronal suture: (0) not extended to crown apex; (1) extended to apex; (2) with carina; (3) absent.
5. Median longitudinal carina: (0) weak; (1) distinct; (2) strongly keeled; (3) incomplete; (4) absent.
6. Crown surface: (0) flat or convex; (1) weakly concave; (2) strongly concave.
7. Crown anterior margin shape in dorsal view: (0) rounded; (1) triangularly produced but not elongate; (2) elongate.
8. Head shape: (0) not depressed; (1) strongly dorsoventrally flattened.
9. Crown lateral carina presence: (0) absent; (1) present.
10. Crown lateral carina development: (0) incomplete; (1) complete; (2) strongly keeled.
11. Marginal carina: (0) absent; (1) present.
12. Marginal carina: (0) weak; (1) distinct; (2) strongly keeled.
13. Latero-ocellar carina: (0) absent; (1) present.
14. Lateral and marginal carina: (0) fused in the front of ocellus; (1) not fused.

15. Submarginal carina: (0) absent; (1) present.
16. Transverse carina: (0) absent; (1) present.
17. Additional complete carina between latero-ocellar carina and lateral carina: (0) absent; (1) present.
18. Pair gibbosities on basal half of crown: (0) absent; (1) present at basal half of head; (2) present medially each side of carina.
19. Crown texture: (0) smooth or finely granulose; (1) rugulose; (2) coarsely rugose.
20. Crown lateral emargination: (0) absent; (1) present.
21. Ocelli development: (0) vestigial; (1) well developed but small; (2) large.
22. Ocelli position: (0) on crown distant from margin; (1) on crown near margin; (2) on or just below margin.
23. Ocelli position: (0) very close to eye (the distance less than 1/4 of length between eye and apex of crown); (1) equidistant from eye and apex of crown; (2) close to eye (the distance about 1/4-1/3 of length between eye and apex of crown).
24. Distance between eyes: (0) more than 1/2 width of pronotum; (1) equal to or narrower than 1/2 width of pronotum.
25. Antennal ledge: (0) absent or greatly reduced; (1) well developed, oblique; (2) well developed, horizontal.
26. Antennal pit: (0) near anteroventral corner of eye; (1) near midheight of eye; (2) near anterodorsal corner of eye.
27. Flagellum: (0) short; (1) more than 1/2 body length.
28. Lateral frontal sutures: (0) absent or invisible externally; (1) extended to crown margin; (2) extended onto crown.
29. Frontoclypeus median longitudinal carina: (0) absent; (1) present dorsally; (2) extended from dorsal margin to clypeal suture.
30. Frontoclypeus oblique lateral carina: (0) absent; (1) present, but weak; (2) strong.
31. Frontoclypeus shape: (0) evenly convex; (1) flattened medially; (2) concave.
32. Lorum size: (0) small, narrower than clypellus; (1) large, wider than clypellus; (2) greatly enlarged.
33. Lorum distance from maxillary plate margin: (0) extended to margin; (1) well separated from margin.
34. Genal margin: (0) narrow, broadly emarginate; (1) wide, rounded; (2) angulately produced.
35. Clypellus shape: (0) tapered distally, convex; (1) parallel-sided or broadened distally, flattened.
36. Clypellus apex: (0) extended beyond maxillary plate margin; (1) even with maxillary plate margin; (2) not extended to maxillary plate margin.
37. Rostrum: (0) not surpassing front trochanters; (1) surpassing front trochanters; (2) extended to or beyond hind coxae.

## Thorax

### Pronotum

- 38. Length: (0) not extended to scutellum; (1) extended to scutellum.
- 39. Setigerous tubercles: (0) absent; (1) present.
- 40. Distinct foveae: (0) absent; (1) present.
- 41. Lateral carina position: (0) even with eye (or absent); (1) below eye.

### Forewing

- 42. Venation: (0) weak, or only distinct on distal part; (1) normal; (2) strong, raised.
- 43. Vein R: (0) free; (1) fused with costal vein in the middle (Fig. 5H).
- 44. Vein R: (0) with 2 branches; (1) with 3 branches; (2) with more than 3 branches.
- 45. Crossvein s: (0) absent; (1) present.
- 46. Crossvein r-m1: (0) absent; (1) present.
- 47. R2 +3: (0) extended obliquely distad; (1) reflexed.
- 48. Crossvein m-cu2: (0) absent; (1) present; (2) with supranumerary crossveins between m-cu1 and m-cu3. State 2 is considered a modified form of state 1.
- 49. Apical cell 3: (0) >2 longer than wide; (1) only slightly, if any, longer than wide.
- 50. Inner apical cell: (0) short, tapered; (1) elongate, parallel-sided; (2) elongate, wider than other cells.
- 51. Cu: (0) connected to submarginal vein at claval apex; (1) connected to submarginal vein well distad of claval apex.
- 52. Appendix: (0) absent; (1) restricted to anal margin; (2) extended around wing apex.
- 53. False veins (costal maculae): (0) absent; (1) 1 present; (2) 2 present; (3) 3 present.
- 54. Claval veins: (0) separate; (1) fused for a short distance; (2) absent.

### Hindwing

- 55. R2 +3: (0) absent; (1) obsolete distally; (2) complete.
- 56. R4 +5 and M1 +2: (0) free, with crossvein; (1) confluent.
- 57. Crossvein m-cu: (0) long, oblique; (1) short, straight; (2) absent, median vein fused with cubital vein for a short distance.

### Front leg

#### Femur

- 58. AM1: (0) near middle of anterior surface; (1) on or near ventral margin.
- 59. Intercalary row: (0) setae of similar size; (1) 2–4 basal setae distinctly larger than others; (2) 1 basal seta distinctly enlarged.

## Tibia

60. Shape: (0) cylindrical; (1) flattened dorsally.

## Middle leg

61. Femur: (0) width subequal to front femur; (1) distinctly wider than front femur.

## Hind leg

62. Femur length: (0) extended to proepimeron (lateral pronotal lobe) at rest; (1) not reaching proepimeron at rest.

63. Femur macrosetae: (0) 2 + 2 + 1; (1) 2 + 1 + 1; (2) 2 + 1; (3) 2 + 0.

64. Tibia row PD, basal seta: (0) even with or slightly distad of basal AD seta; (1) even with second seta of AD.

65. Tibia row AV: (0) extended nearly entire length; (1) restricted to distal 1/2.

66. Tarsus: (0) normal; (1) greatly elongate.

67. Tarsomere I pecten: (0) with 5 or more platellae; (1) with 3–4 platellae; (2) with 2 platellae; (3) without platellae (apex tapered).

68. Tarsomere I pecten platellae: (0) normal; (1) setiform.

## Male pygofer

69. Macrosetae: (0) absent; (1) scattered; (2) in distinct group.

70. Dorsal process: (0) absent; (1) present.

71. Ventral process: (0) absent; (1) toothlike; (2) elongate, inornate; (3) elongate, stocky or branched.

72. Position of ventral process: (0) basal; (1) distal.

73. Segment X shape: (0) semicylindrical; (1) cylindrical.

74. Anal hooks (basolateral processes of segment X) : (0) absent; (1) present.

75. Segment X posterolateral processes: (0) absent; (1) present.

76. Valve: (0) free; (1) fused to pygofer.

77. Subgenital plates: (0) free; (1) fused to valve.

78. Subgenital plates: (0) free; (1) partially fused to each other.

79. Subgenital plate macrosetae: (0) absent; (1) numerous, scattered; (2) numerous, uniseriate; (3) 6 or fewer.

80. Subgenital plate shape: (0) broad basally with apex attenuate; (1) triangular, depressed; (2) ligulate; (3) boatlike.

81. Subgenital plate apex: (0) not round and expanded; (1) rounded and expanded.
82. Connective: (0) Y shaped with arms only slightly divergent; (1) nearly T-shaped (arms strongly divergent); (2) X shape.
83. Stem and arm of connective: (0) arm shorter than 1/4 length of stem; (1) arm shorter than stem, but longer than 1/4 length of stem (2) stem almost equal with arm or longer.
84. Connective: (0) without median anterior lobe; (1) with median anterior lobe.
85. Style apodeme: (0) elongate; (1) short.
86. Style preapical lobe: (0) absent; (1) short, rounded; (2) large, acute.
87. Style apophysis: (0) without preapical tooth; (1) with preapical tooth; (2) preapical tooth on heellike extension.
88. Apex of style apophysis: (0) poorly developed; (1) well developed, about 1/3 length of style; (2) well developed, about 1/2 length of style or longer.
89. Aedeagus, ventral process: (0) absent; (1) poorly developed, odontoid; (2) well developed, salient; (3) well developed, elongate or branched.
90. Aedeagus, paired dorsal atrial processes: (0) absent; (1) present.
91. Aedeagus dorsal apodeme: (0) absent or weakly sclerotized; (1) divided into pair of lateral arms; (2) arms fused dorsomedially; (3) with single compressed dorsomedial process.
92. Aedeagus, paired distal processes: (0) absent; (1) simple; (2) branched.
93. Aedeagal shaft: (0) recurved; (1) straight; (2) arcuate.
94. Aedeagal shape in lateral view: (0) similar to *Cunedda phaeopes* (shaft recurved dorsally, apodeme arising from atrium and extended dorsolaterad; ventral apophysis strong raised); (1) other types.

#### Female

95. First valvulae sculpturing: (0) strigate; (1) concatenate/areolate; (2) granulose.

#### Second valvulae

96. Middorsal cleft: (0) absent; (1) present.
97. Middorsal tooth: (0) absent; (1) simple; (2) coelidiinelike with pair of lateral teeth just basad of medial tooth.
98. Dorsal serrations: (0) symmetrical, simple; (1) symmetrical, with smaller teeth between larger ones; (2) asymmetrical, irregular.
99. Shape: (0) not strongly sinuate; (1) strongly sinuate.
100. Toothed blade length: (0) less than 1/3 total length; (1) more than 2/3 total length

## Supplementary Text S2. Morphological apomorphies.

Numbered nodes on the following tree diagram correspond to those in the list of apomorphies given below. ACCTRAN character optimization was used. The following tree is ML tree estimated from the combined dataset, the same one as shown in Figure 1.

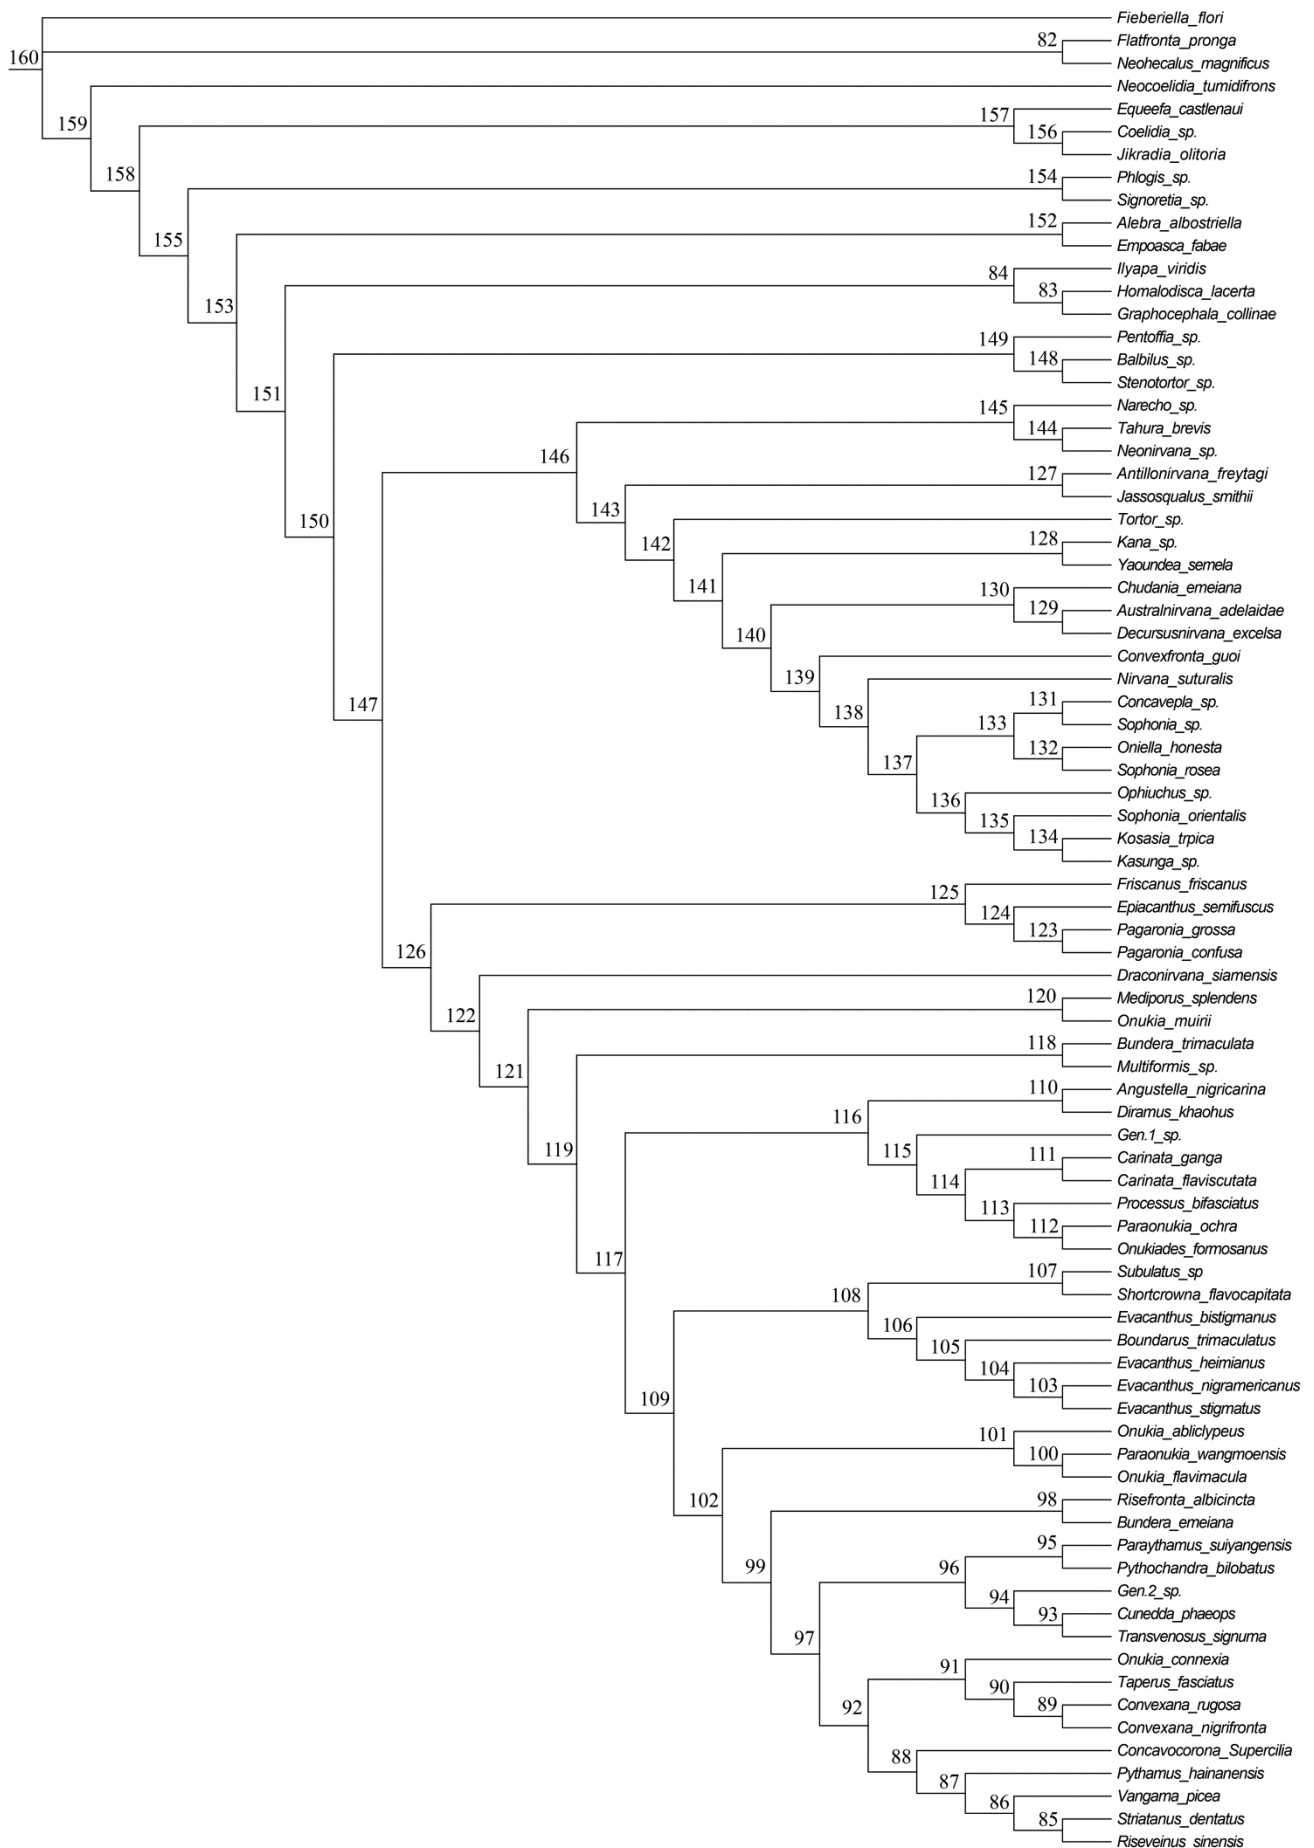

Apomorphy lists:

| Branch                            | Character            | Steps | CI      | Change  |
|-----------------------------------|----------------------|-------|---------|---------|
| node_160 --> Fieberiella flori    | 44                   | 1     | 0.133   | 1 --> 2 |
|                                   | 46                   | 1     | 0.167   | 0 --> 1 |
|                                   | 48                   | 1     | 0.091   | 0 --> 1 |
|                                   | 51                   | 1     | 0.200   | 0 --> 1 |
|                                   | 56                   | 1     | 0.077   | 0 --> 1 |
|                                   | 71                   | 1     | 0.094   | 0 --> 3 |
|                                   | 74                   | 1     | 0.111   | 0 ==> 1 |
|                                   | 88                   | 1     | 0.074   | 0 ==> 1 |
|                                   | 91                   | 1     | 0.125   | 0 --> 3 |
|                                   | node_160 --> node_82 | 36    | 1       | 0.125   |
| 72                                |                      | 1     | 0.091   | 0 --> 1 |
| 79                                |                      | 1     | 0.136   | 0 --> 2 |
| node_82 --> Flatfronta pronga     | 86                   | 1     | 0.087   | 0 --> 1 |
|                                   | 12                   | 1     | 0.143   | 1 ==> 0 |
|                                   | 26                   | 1     | 0.286   | 1 ==> 2 |
|                                   | 31                   | 1     | 0.300   | 0 ==> 2 |
|                                   | 33                   | 1     | 0.500   | 1 ==> 0 |
|                                   | 48                   | 1     | 0.091   | 0 --> 1 |
|                                   | 50                   | 1     | 0.154   | 1 ==> 2 |
|                                   | 67                   | 1     | 0.273   | 0 ==> 1 |
|                                   | 71                   | 1     | 0.094   | 0 --> 3 |
|                                   | 85                   | 1     | 0.250   | 0 --> 1 |
| node_82 --> Neohecalus magnificus | 90                   | 1     | 0.067   | 1 ==> 0 |
|                                   | 3                    | 1     | 0.130   | 0 ==> 2 |
|                                   | 30                   | 1     | 0.167   | 0 ==> 1 |
|                                   | 44                   | 1     | 0.133   | 1 --> 0 |
|                                   | 46                   | 1     | 0.167   | 0 --> 1 |
|                                   | 53                   | 1     | 0.200   | 0 ==> 1 |
|                                   | 69                   | 1     | 0.154   | 1 ==> 2 |
|                                   | 86                   | 1     | 0.087   | 1 --> 2 |
|                                   | 91                   | 1     | 0.125   | 0 --> 3 |
|                                   | 92                   | 1     | 0.087   | 0 --> 1 |
| node_160 --> node_159             | 98                   | 1     | 0.286   | 0 ==> 2 |
|                                   | 100                  | 1     | 0.333   | 0 ==> 1 |
|                                   | 2                    | 1     | 0.200   | 0 ==> 1 |
|                                   | 4                    | 1     | 0.167   | 0 ==> 2 |
|                                   | 7                    | 1     | 0.091   | 1 ==> 0 |
|                                   | 11                   | 1     | 0.200   | 1 ==> 0 |
|                                   | 23                   | 1     | 0.182   | 0 --> 1 |
|                                   | 25                   | 1     | 0.182   | 0 --> 2 |
|                                   | 34                   | 1     | 0.250   | 2 --> 0 |
|                                   | 37                   | 1     | 0.250   | 0 ==> 1 |
| 41                                | 1                    | 0.167 | 0 --> 1 |         |
| 45                                | 1                    | 0.125 | 0 --> 1 |         |
| 49                                | 1                    | 0.143 | 1 ==> 0 |         |

|                       |     |   |       |         |
|-----------------------|-----|---|-------|---------|
|                       | 58  | 1 | 0.333 | 1 ==> 0 |
|                       | 69  | 1 | 0.154 | 1 ==> 0 |
|                       | 70  | 1 | 0.125 | 0 --> 1 |
|                       | 80  | 1 | 1.000 | 1 --> 2 |
|                       | 83  | 1 | 0.083 | 2 ==> 1 |
|                       | 85  | 1 | 0.250 | 0 --> 1 |
|                       | 92  | 1 | 0.087 | 0 --> 1 |
| node_159 --> node_158 | 30  | 1 | 0.167 | 0 ==> 1 |
|                       | 57  | 1 | 0.333 | 1 --> 0 |
|                       | 67  | 1 | 0.273 | 0 ==> 1 |
|                       | 76  | 1 | 0.333 | 0 --> 1 |
| node_158 --> node_155 | 32  | 1 | 0.500 | 1 --> 0 |
|                       | 35  | 1 | 1.000 | 1 ==> 0 |
|                       | 41  | 1 | 0.167 | 1 --> 0 |
|                       | 61  | 1 | 0.500 | 1 --> 0 |
|                       | 63  | 1 | 0.600 | 0 --> 1 |
|                       | 70  | 1 | 0.125 | 1 --> 0 |
|                       | 91  | 1 | 0.125 | 0 --> 1 |
| node_155 --> node_153 | 4   | 1 | 0.167 | 2 --> 1 |
|                       | 10  | 1 | 0.182 | 0 --> 1 |
|                       | 34  | 1 | 0.250 | 0 --> 1 |
|                       | 45  | 1 | 0.125 | 1 --> 0 |
|                       | 79  | 1 | 0.136 | 0 --> 1 |
|                       | 82  | 1 | 0.118 | 0 ==> 1 |
| node_153 --> node_151 | 3   | 1 | 0.130 | 0 --> 1 |
|                       | 7   | 1 | 0.091 | 0 --> 1 |
|                       | 22  | 1 | 0.400 | 2 --> 0 |
|                       | 23  | 1 | 0.182 | 1 --> 2 |
|                       | 25  | 1 | 0.182 | 2 ==> 1 |
|                       | 36  | 1 | 0.125 | 0 --> 1 |
|                       | 37  | 1 | 0.250 | 1 --> 0 |
|                       | 48  | 1 | 0.091 | 0 --> 1 |
|                       | 61  | 1 | 0.500 | 0 --> 1 |
|                       | 64  | 1 | 0.250 | 0 ==> 1 |
|                       | 69  | 1 | 0.154 | 0 --> 2 |
|                       | 84  | 1 | 0.083 | 0 --> 1 |
|                       | 85  | 1 | 0.250 | 1 ==> 0 |
| node_151 --> node_84  | 28  | 1 | 0.250 | 1 ==> 2 |
|                       | 31  | 1 | 0.300 | 0 --> 1 |
|                       | 34  | 1 | 0.250 | 1 --> 0 |
|                       | 45  | 1 | 0.125 | 0 --> 1 |
|                       | 46  | 1 | 0.167 | 0 ==> 1 |
|                       | 50  | 1 | 0.154 | 1 --> 2 |
|                       | 62  | 1 | 0.250 | 0 ==> 1 |
|                       | 68  | 1 | 0.200 | 0 --> 1 |
|                       | 100 | 1 | 0.333 | 0 ==> 1 |
| node_84 --> node_83   | 21  | 1 | 0.333 | 1 ==> 2 |
|                       | 36  | 1 | 0.125 | 1 --> 0 |
|                       | 37  | 1 | 0.250 | 0 --> 1 |



|                                    |    |   |       |         |
|------------------------------------|----|---|-------|---------|
|                                    | 41 | 1 | 0.167 | 0 --> 1 |
|                                    | 52 | 1 | 0.400 | 1 ==> 2 |
|                                    | 55 | 1 | 0.500 | 2 --> 0 |
|                                    | 69 | 1 | 0.154 | 2 --> 0 |
|                                    | 73 | 1 | 0.333 | 0 ==> 1 |
|                                    | 76 | 1 | 0.333 | 1 ==> 0 |
|                                    | 79 | 1 | 0.136 | 1 --> 0 |
|                                    | 80 | 1 | 1.000 | 2 ==> 0 |
|                                    | 82 | 1 | 0.118 | 1 ==> 0 |
|                                    | 84 | 1 | 0.083 | 1 --> 0 |
| node_83 --> Homalodisca lacerta    | 1  | 1 | 0.071 | 0 ==> 1 |
|                                    | 6  | 1 | 0.111 | 0 ==> 1 |
|                                    | 25 | 1 | 0.182 | 1 ==> 2 |
|                                    | 54 | 1 | 0.667 | 0 ==> 1 |
|                                    | 55 | 1 | 0.500 | 0 --> 1 |
|                                    | 63 | 1 | 0.600 | 1 ==> 2 |
|                                    | 67 | 1 | 0.273 | 1 ==> 0 |
|                                    | 83 | 1 | 0.083 | 1 ==> 2 |
|                                    | 93 | 1 | 0.333 | 0 ==> 1 |
| node_83 --> Graphocephala collinae | 7  | 1 | 0.091 | 1 --> 0 |
|                                    | 31 | 1 | 0.300 | 1 --> 0 |
|                                    | 50 | 1 | 0.154 | 2 --> 1 |
|                                    | 68 | 1 | 0.200 | 1 --> 0 |
|                                    | 69 | 1 | 0.154 | 0 --> 1 |
|                                    | 79 | 1 | 0.136 | 0 --> 2 |
|                                    | 92 | 1 | 0.087 | 1 ==> 0 |
| node_84 --> Ilyapa viridis         | 2  | 1 | 0.200 | 1 ==> 0 |
|                                    | 3  | 1 | 0.130 | 1 --> 0 |
|                                    | 4  | 1 | 0.167 | 1 --> 0 |
|                                    | 26 | 1 | 0.286 | 1 ==> 2 |
|                                    | 44 | 1 | 0.133 | 1 --> 2 |
|                                    | 47 | 1 | 0.200 | 0 ==> 1 |
|                                    | 48 | 1 | 0.091 | 1 --> 2 |
|                                    | 49 | 1 | 0.143 | 0 ==> 1 |
|                                    | 58 | 1 | 0.333 | 0 ==> 1 |
|                                    | 71 | 1 | 0.094 | 0 --> 2 |
|                                    | 75 | 1 | 0.500 | 0 ==> 1 |
|                                    | 86 | 1 | 0.087 | 0 ==> 2 |
|                                    | 90 | 1 | 0.067 | 1 ==> 0 |
|                                    | 91 | 1 | 0.125 | 1 --> 3 |
|                                    | 98 | 1 | 0.286 | 0 ==> 2 |
| node_151 --> node_150              | 4  | 1 | 0.167 | 1 --> 2 |
|                                    | 11 | 1 | 0.200 | 0 ==> 1 |
|                                    | 22 | 1 | 0.400 | 0 --> 1 |
|                                    | 29 | 1 | 0.286 | 0 --> 1 |
|                                    | 57 | 1 | 0.333 | 0 --> 1 |
|                                    | 59 | 1 | 0.154 | 0 --> 2 |
|                                    | 96 | 1 | 0.200 | 0 --> 1 |
| node_150 --> node_147              | 3  | 1 | 0.130 | 1 --> 2 |

|                       |    |   |       |         |
|-----------------------|----|---|-------|---------|
|                       | 48 | 1 | 0.091 | 1 --> 0 |
|                       | 71 | 1 | 0.094 | 0 --> 3 |
|                       | 91 | 1 | 0.125 | 1 --> 2 |
| node_147 --> node_126 | 34 | 1 | 0.250 | 1 --> 0 |
|                       | 36 | 1 | 0.125 | 1 --> 0 |
|                       | 37 | 1 | 0.250 | 0 --> 1 |
|                       | 41 | 1 | 0.167 | 0 --> 1 |
|                       | 59 | 1 | 0.154 | 2 --> 1 |
|                       | 69 | 1 | 0.154 | 2 --> 0 |
|                       | 86 | 1 | 0.087 | 0 --> 1 |
| node_126 --> node_122 | 5  | 1 | 0.250 | 4 ==> 1 |
|                       | 6  | 1 | 0.111 | 0 --> 2 |
|                       | 9  | 1 | 0.333 | 0 ==> 1 |
|                       | 23 | 1 | 0.182 | 2 ==> 1 |
|                       | 25 | 1 | 0.182 | 1 ==> 0 |
|                       | 68 | 1 | 0.200 | 0 ==> 1 |
|                       | 71 | 1 | 0.094 | 3 --> 0 |
|                       | 82 | 1 | 0.118 | 1 ==> 0 |
|                       | 84 | 1 | 0.083 | 1 ==> 0 |
|                       | 95 | 1 | 0.250 | 1 ==> 0 |
| node_122 --> node_121 | 17 | 1 | 0.100 | 0 ==> 1 |
|                       | 29 | 1 | 0.286 | 1 --> 2 |
|                       | 87 | 1 | 0.095 | 0 ==> 1 |
|                       | 89 | 1 | 0.111 | 0 ==> 2 |
|                       | 91 | 1 | 0.125 | 2 --> 1 |
|                       | 92 | 1 | 0.087 | 1 ==> 0 |
| node_121 --> node_119 | 1  | 1 | 0.071 | 0 ==> 1 |
|                       | 3  | 1 | 0.130 | 2 --> 1 |
|                       | 6  | 1 | 0.111 | 2 --> 1 |
|                       | 13 | 1 | 0.143 | 0 ==> 1 |
| node_117 --> node_109 | 6  | 1 | 0.111 | 1 --> 2 |
|                       | 18 | 1 | 0.200 | 0 --> 1 |
|                       | 87 | 1 | 0.095 | 1 --> 0 |
|                       | 88 | 1 | 0.074 | 0 --> 2 |
| node_109 --> node_102 | 10 | 1 | 0.182 | 1 --> 2 |
|                       | 94 | 1 | 0.167 | 1 ==> 0 |
| node_102 --> node_99  | 17 | 1 | 0.100 | 1 --> 0 |
|                       | 87 | 1 | 0.095 | 0 --> 2 |
| node_99 --> node_97   | 7  | 1 | 0.091 | 1 --> 2 |
|                       | 18 | 1 | 0.200 | 1 --> 0 |
| node_97 --> node_92   | 19 | 1 | 0.105 | 0 --> 1 |
|                       | 94 | 1 | 0.167 | 0 --> 1 |
| node_92 --> node_88   | 3  | 1 | 0.130 | 1 --> 0 |
|                       | 12 | 1 | 0.143 | 1 ==> 2 |
|                       | 13 | 1 | 0.143 | 1 ==> 0 |
|                       | 14 | 1 | 0.500 | 1 ==> 0 |
|                       | 16 | 1 | 0.167 | 0 ==> 1 |
|                       | 19 | 1 | 0.105 | 1 --> 2 |
|                       | 23 | 1 | 0.182 | 1 ==> 2 |

|                                             |    |   |       |         |
|---------------------------------------------|----|---|-------|---------|
|                                             | 59 | 1 | 0.154 | 1 --> 0 |
| node_88 --> node_87                         | 3  | 1 | 0.130 | 0 --> 2 |
|                                             | 5  | 1 | 0.250 | 1 ==> 2 |
|                                             | 88 | 1 | 0.074 | 2 --> 1 |
|                                             | 89 | 1 | 0.111 | 2 --> 0 |
| node_87 --> node_86                         | 3  | 1 | 0.130 | 2 --> 3 |
|                                             | 18 | 1 | 0.200 | 0 --> 2 |
|                                             | 54 | 1 | 0.667 | 0 ==> 1 |
|                                             | 82 | 1 | 0.118 | 0 ==> 1 |
|                                             | 89 | 1 | 0.111 | 0 --> 3 |
| node_86 --> node_85                         | 16 | 1 | 0.167 | 1 ==> 0 |
|                                             | 42 | 1 | 0.250 | 1 ==> 2 |
|                                             | 83 | 1 | 0.083 | 1 ==> 0 |
|                                             | 84 | 1 | 0.083 | 0 ==> 1 |
| node_85 --> <i>Striatanus dentatus</i>      | 71 | 1 | 0.094 | 0 ==> 3 |
|                                             | 86 | 1 | 0.087 | 1 ==> 0 |
|                                             | 88 | 1 | 0.074 | 1 --> 2 |
|                                             | 89 | 1 | 0.111 | 3 ==> 1 |
|                                             | 92 | 1 | 0.087 | 0 ==> 1 |
| node_86 --> <i>Vangama picea</i>            | 74 | 1 | 0.111 | 0 ==> 1 |
|                                             | 75 | 1 | 0.500 | 0 ==> 1 |
|                                             | 87 | 1 | 0.095 | 2 ==> 0 |
|                                             | 88 | 1 | 0.074 | 1 ==> 0 |
|                                             | 90 | 1 | 0.067 | 1 ==> 0 |
|                                             | 91 | 1 | 0.125 | 1 ==> 0 |
| node_87 --> <i>Pythamus hainanensis</i>     | 36 | 1 | 0.125 | 0 ==> 1 |
|                                             | 59 | 1 | 0.154 | 0 --> 1 |
| node_88 --> <i>Concavocorona Supercilia</i> | 7  | 1 | 0.091 | 2 --> 1 |
|                                             | 18 | 1 | 0.200 | 0 --> 1 |
|                                             | 71 | 1 | 0.094 | 0 ==> 2 |
|                                             | 94 | 1 | 0.167 | 1 --> 0 |
| node_92 --> node_91                         | 6  | 1 | 0.111 | 2 --> 0 |
|                                             | 10 | 1 | 0.182 | 2 ==> 1 |
|                                             | 17 | 1 | 0.100 | 0 --> 1 |
|                                             | 79 | 1 | 0.136 | 1 ==> 2 |
|                                             | 83 | 1 | 0.083 | 1 --> 0 |
| node_90 --> <i>Taperus fasciatus</i>        | 23 | 1 | 0.182 | 1 ==> 2 |
|                                             | 69 | 1 | 0.154 | 0 ==> 2 |
|                                             | 83 | 1 | 0.083 | 0 --> 1 |
| node_90 --> node_89                         | 6  | 1 | 0.111 | 0 ==> 1 |
|                                             | 82 | 1 | 0.118 | 0 ==> 1 |
|                                             | 84 | 1 | 0.083 | 0 ==> 1 |
| node_89 --> <i>Convexana rugosa</i>         | 17 | 1 | 0.100 | 1 ==> 0 |
|                                             | 88 | 1 | 0.074 | 2 ==> 1 |
|                                             | 89 | 1 | 0.111 | 2 ==> 1 |
| node_89 --> <i>Convexana nigrifronta</i>    | 7  | 1 | 0.091 | 2 --> 1 |
|                                             | 48 | 1 | 0.091 | 0 ==> 1 |
| node_91 --> <i>Onukia connexia</i>          | 7  | 1 | 0.091 | 2 --> 1 |
|                                             | 30 | 1 | 0.167 | 1 ==> 0 |

|                                      |    |   |       |         |
|--------------------------------------|----|---|-------|---------|
|                                      | 89 | 1 | 0.111 | 2 ==> 0 |
|                                      | 92 | 1 | 0.087 | 0 ==> 1 |
| node_97 --> node_96                  | 5  | 1 | 0.250 | 1 ==> 2 |
|                                      | 18 | 1 | 0.200 | 0 --> 2 |
|                                      | 42 | 1 | 0.250 | 1 --> 2 |
| node_96 --> node_94                  | 12 | 1 | 0.143 | 1 ==> 0 |
| node_94 --> node_93                  | 13 | 1 | 0.143 | 1 ==> 0 |
|                                      | 17 | 1 | 0.100 | 0 --> 1 |
| node_93 --> Cunedda phaeops          | 42 | 1 | 0.250 | 2 --> 1 |
| node_93 --> Transvenosus signuma     | 71 | 1 | 0.094 | 0 ==> 2 |
| node_94 --> Gen.2 sp.n.              | 37 | 1 | 0.250 | 1 ==> 2 |
|                                      | 59 | 1 | 0.154 | 1 ==> 0 |
|                                      | 83 | 1 | 0.083 | 1 ==> 0 |
| node_95 --> Paraythamus suiyangensis | 17 | 1 | 0.100 | 0 --> 1 |
|                                      | 48 | 1 | 0.091 | 0 ==> 1 |
|                                      | 59 | 1 | 0.154 | 1 ==> 0 |
|                                      | 79 | 1 | 0.136 | 1 ==> 2 |
|                                      | 87 | 1 | 0.095 | 2 ==> 1 |
|                                      | 88 | 1 | 0.074 | 2 ==> 1 |
|                                      | 89 | 1 | 0.111 | 2 ==> 0 |
|                                      | 91 | 1 | 0.125 | 1 ==> 2 |
|                                      | 92 | 1 | 0.087 | 0 ==> 1 |
|                                      | 94 | 1 | 0.167 | 0 ==> 1 |
| node_95 --> Pythochandra bilobatus   | 19 | 1 | 0.105 | 0 ==> 1 |
|                                      | 42 | 1 | 0.250 | 2 --> 1 |
|                                      | 62 | 1 | 0.250 | 0 ==> 1 |
|                                      | 71 | 1 | 0.094 | 0 ==> 3 |
|                                      | 82 | 1 | 0.118 | 0 ==> 1 |
|                                      | 83 | 1 | 0.083 | 1 ==> 0 |
| node_99 --> node_98                  | 6  | 1 | 0.111 | 2 --> 0 |
|                                      | 16 | 1 | 0.167 | 0 ==> 1 |
| node_98 --> Risefronta albicincta    | 69 | 1 | 0.154 | 0 ==> 2 |
|                                      | 71 | 1 | 0.094 | 0 ==> 2 |
|                                      | 83 | 1 | 0.083 | 1 ==> 0 |
| node_98 --> Bundera emeiana          | 10 | 1 | 0.182 | 2 ==> 1 |
|                                      | 56 | 1 | 0.077 | 0 ==> 1 |
|                                      | 86 | 1 | 0.087 | 1 ==> 0 |
| node_102 --> node_101                | 13 | 1 | 0.143 | 1 ==> 0 |
|                                      | 70 | 1 | 0.125 | 0 --> 1 |
|                                      | 72 | 1 | 0.091 | 0 --> 1 |
|                                      | 86 | 1 | 0.087 | 1 --> 0 |
|                                      | 88 | 1 | 0.074 | 2 --> 0 |
| node_101 --> Onukia abliclypeus      | 18 | 1 | 0.200 | 1 ==> 2 |
|                                      | 59 | 1 | 0.154 | 1 ==> 0 |
| node_101 --> node_100                | 6  | 1 | 0.111 | 2 --> 1 |
|                                      | 7  | 1 | 0.091 | 1 ==> 2 |
|                                      | 19 | 1 | 0.105 | 0 ==> 1 |
|                                      | 23 | 1 | 0.182 | 1 ==> 2 |
|                                      | 53 | 1 | 0.200 | 0 --> 1 |

|                                       |    |   |       |         |
|---------------------------------------|----|---|-------|---------|
|                                       | 56 | 1 | 0.077 | 0 ==> 1 |
|                                       | 79 | 1 | 0.136 | 1 ==> 2 |
|                                       | 87 | 1 | 0.095 | 0 --> 1 |
| node_100 --> Paraonukia wangmoensis   | 17 | 1 | 0.100 | 1 ==> 0 |
|                                       | 18 | 1 | 0.200 | 1 --> 0 |
|                                       | 37 | 1 | 0.250 | 1 ==> 0 |
|                                       | 53 | 1 | 0.200 | 1 --> 2 |
|                                       | 71 | 1 | 0.094 | 0 ==> 1 |
|                                       | 82 | 1 | 0.118 | 0 ==> 1 |
|                                       | 83 | 1 | 0.083 | 1 ==> 0 |
|                                       | 86 | 1 | 0.087 | 0 --> 1 |
|                                       | 89 | 1 | 0.111 | 2 ==> 3 |
|                                       | 94 | 1 | 0.167 | 0 ==> 1 |
| node_100 --> Onukia flavimacula       | 3  | 1 | 0.130 | 1 ==> 2 |
|                                       | 70 | 1 | 0.125 | 1 --> 0 |
|                                       | 88 | 1 | 0.074 | 0 ==> 1 |
| node_109 --> node_108                 | 89 | 1 | 0.111 | 2 ==> 0 |
| node_108 --> node_106                 | 6  | 1 | 0.111 | 2 --> 1 |
|                                       | 16 | 1 | 0.167 | 0 ==> 1 |
|                                       | 48 | 1 | 0.091 | 0 ==> 1 |
|                                       | 57 | 1 | 0.333 | 1 --> 2 |
|                                       | 71 | 1 | 0.094 | 0 --> 3 |
|                                       | 87 | 1 | 0.095 | 0 --> 2 |
| node_106 --> node_105                 | 7  | 1 | 0.091 | 1 ==> 0 |
|                                       | 10 | 1 | 0.182 | 1 --> 0 |
|                                       | 13 | 1 | 0.143 | 1 ==> 0 |
|                                       | 14 | 1 | 0.500 | 1 ==> 0 |
|                                       | 17 | 1 | 0.100 | 1 ==> 0 |
|                                       | 88 | 1 | 0.074 | 2 --> 1 |
| node_105 --> node_104                 | 31 | 1 | 0.300 | 0 ==> 3 |
|                                       | 48 | 1 | 0.091 | 1 ==> 2 |
|                                       | 57 | 1 | 0.333 | 2 --> 1 |
|                                       | 59 | 1 | 0.154 | 1 ==> 0 |
|                                       | 68 | 1 | 0.200 | 1 ==> 0 |
|                                       | 86 | 1 | 0.087 | 1 ==> 2 |
|                                       | 89 | 1 | 0.111 | 0 ==> 1 |
| node_104 --> node_103                 | 42 | 1 | 0.250 | 1 ==> 2 |
| node_103--> Evacanthus nigramericanus | 49 | 1 | 0.143 | 0 ==> 1 |
|                                       | 50 | 1 | 0.154 | 1 ==> 0 |
|                                       | 89 | 1 | 0.111 | 1 ==> 3 |
| node_103 --> Evacanthus stigmatus     | 1  | 1 | 0.071 | 1 ==> 0 |
|                                       | 5  | 1 | 0.250 | 1 ==> 0 |
|                                       | 44 | 1 | 0.133 | 1 ==> 2 |
|                                       | 74 | 1 | 0.111 | 0 ==> 1 |
| node_104 --> Evacanthus heimianus     | 10 | 1 | 0.182 | 0 --> 1 |
| node_105 --> Boundarus trimaculatus   | 1  | 1 | 0.071 | 1 ==> 0 |
|                                       | 5  | 1 | 0.250 | 1 ==> 0 |
|                                       | 12 | 1 | 0.143 | 1 ==> 0 |
|                                       | 19 | 1 | 0.105 | 0 ==> 1 |

|                                      |    |   |       |         |
|--------------------------------------|----|---|-------|---------|
|                                      | 44 | 1 | 0.133 | 1 ==> 2 |
|                                      | 49 | 1 | 0.143 | 0 ==> 1 |
|                                      | 50 | 1 | 0.154 | 1 ==> 0 |
|                                      | 71 | 1 | 0.094 | 3 --> 0 |
|                                      | 83 | 1 | 0.083 | 1 ==> 0 |
|                                      | 87 | 1 | 0.095 | 2 --> 1 |
|                                      | 92 | 1 | 0.087 | 0 ==> 1 |
| node_106 --> Evacanthus bistigmanus  | 46 | 1 | 0.167 | 0 ==> 1 |
|                                      | 56 | 1 | 0.077 | 0 ==> 1 |
|                                      | 72 | 1 | 0.091 | 0 ==> 1 |
|                                      | 79 | 1 | 0.136 | 1 ==> 2 |
| node_108 --> node_107                | 3  | 1 | 0.130 | 1 ==> 0 |
|                                      | 59 | 1 | 0.154 | 1 ==> 0 |
| node_107 --> Subulatus sp.n.         | 10 | 1 | 0.182 | 1 --> 2 |
|                                      | 13 | 1 | 0.143 | 1 ==> 0 |
|                                      | 18 | 1 | 0.200 | 1 --> 0 |
|                                      | 69 | 1 | 0.154 | 0 ==> 1 |
|                                      | 71 | 1 | 0.094 | 0 --> 2 |
| node_107-->Shortcrowna flavocapitata | 7  | 1 | 0.091 | 1 ==> 0 |
|                                      | 17 | 1 | 0.100 | 1 ==> 0 |
|                                      | 64 | 1 | 0.250 | 1 ==> 0 |
|                                      | 82 | 1 | 0.118 | 0 ==> 1 |
|                                      | 83 | 1 | 0.083 | 1 ==> 0 |
|                                      | 84 | 1 | 0.083 | 0 ==> 1 |
|                                      | 88 | 1 | 0.074 | 2 --> 0 |
| node_117 --> node_116                | 71 | 1 | 0.094 | 0 --> 2 |
|                                      | 89 | 1 | 0.111 | 2 --> 1 |
| node_116 --> node_110                | 56 | 1 | 0.077 | 0 ==> 1 |
|                                      | 88 | 1 | 0.074 | 0 ==> 1 |
| node_110 --> Angustella nigricarina  | 48 | 1 | 0.091 | 0 ==> 2 |
|                                      | 86 | 1 | 0.087 | 1 ==> 2 |
|                                      | 87 | 1 | 0.095 | 1 --> 2 |
|                                      | 89 | 1 | 0.111 | 1 --> 2 |
| node_110 --> Dirus khaohus           | 74 | 1 | 0.111 | 0 ==> 1 |
|                                      | 92 | 1 | 0.087 | 0 ==> 1 |
| node_116 --> node_115                | 6  | 1 | 0.111 | 1 --> 0 |
|                                      | 19 | 1 | 0.105 | 0 ==> 1 |
|                                      | 71 | 1 | 0.094 | 2 --> 3 |
| node_115 --> Gen.1 sp.n.             | 53 | 1 | 0.200 | 0 ==> 2 |
|                                      | 82 | 1 | 0.118 | 0 ==> 2 |
| node_115 --> node_114                | 72 | 1 | 0.091 | 0 --> 1 |
|                                      | 79 | 1 | 0.136 | 1 ==> 2 |
|                                      | 84 | 1 | 0.083 | 0 ==> 1 |
|                                      | 89 | 1 | 0.111 | 1 --> 0 |
| node_114 --> node_111                | 48 | 1 | 0.091 | 0 --> 1 |
| node_111 --> Carinata ganga          | 1  | 1 | 0.071 | 1 ==> 0 |
|                                      | 48 | 1 | 0.091 | 1 --> 2 |
|                                      | 86 | 1 | 0.087 | 1 ==> 0 |
|                                      | 89 | 1 | 0.111 | 0 --> 3 |

|                                    |    |   |       |         |
|------------------------------------|----|---|-------|---------|
|                                    | 91 | 1 | 0.125 | 1 ==> 2 |
| node_111 --> Carinata flaviscutata | 72 | 1 | 0.091 | 1 --> 0 |
|                                    | 82 | 1 | 0.118 | 0 ==> 1 |
|                                    | 83 | 1 | 0.083 | 1 ==> 0 |
|                                    | 87 | 1 | 0.095 | 1 ==> 0 |
| node_114 --> node_113              | 71 | 1 | 0.094 | 3 --> 0 |
|                                    | 88 | 1 | 0.074 | 0 --> 1 |
|                                    | 92 | 1 | 0.087 | 0 ==> 1 |
| node_113 --> Processus bifasciatus | 56 | 1 | 0.077 | 0 ==> 1 |
|                                    | 57 | 1 | 0.333 | 1 ==> 2 |
|                                    | 71 | 1 | 0.094 | 0 --> 2 |
|                                    | 89 | 1 | 0.111 | 0 --> 1 |
| node_113 --> node_112              | 1  | 1 | 0.071 | 1 ==> 0 |
|                                    | 6  | 1 | 0.111 | 0 ==> 1 |
|                                    | 91 | 1 | 0.125 | 1 ==> 2 |
| node_112 --> Paraonukia ochra      | 46 | 1 | 0.167 | 0 ==> 1 |
|                                    | 82 | 1 | 0.118 | 0 ==> 1 |
|                                    | 87 | 1 | 0.095 | 1 ==> 2 |
|                                    | 89 | 1 | 0.111 | 0 --> 3 |
| node_112 --> Onukiades formosanus  | 69 | 1 | 0.154 | 0 ==> 1 |
|                                    | 83 | 1 | 0.083 | 1 ==> 2 |
|                                    | 84 | 1 | 0.083 | 1 ==> 0 |
|                                    | 86 | 1 | 0.087 | 1 ==> 0 |
|                                    | 88 | 1 | 0.074 | 1 --> 0 |
| node_119 --> node_118              | 18 | 1 | 0.200 | 0 ==> 2 |
|                                    | 59 | 1 | 0.154 | 1 ==> 0 |
| node_118 --> Multiformis sp.       | 3  | 1 | 0.130 | 1 ==> 0 |
|                                    | 10 | 1 | 0.182 | 1 --> 2 |
|                                    | 12 | 1 | 0.143 | 1 ==> 0 |
|                                    | 48 | 1 | 0.091 | 0 ==> 1 |
|                                    | 79 | 1 | 0.136 | 1 --> 2 |
|                                    | 84 | 1 | 0.083 | 0 ==> 1 |
|                                    | 87 | 1 | 0.095 | 1 --> 2 |
|                                    | 88 | 1 | 0.074 | 0 ==> 1 |
|                                    | 89 | 1 | 0.111 | 2 ==> 3 |
| node_118 --> Bundera trimaculata   | 17 | 1 | 0.100 | 1 ==> 0 |
|                                    | 19 | 1 | 0.105 | 0 ==> 1 |
|                                    | 94 | 1 | 0.167 | 1 ==> 0 |
| node_120 --> Mediporus splendens   | 5  | 1 | 0.250 | 1 ==> 2 |
|                                    | 10 | 1 | 0.182 | 1 --> 2 |
|                                    | 23 | 1 | 0.182 | 1 ==> 2 |
|                                    | 48 | 1 | 0.091 | 0 ==> 1 |
|                                    | 53 | 1 | 0.200 | 0 ==> 2 |
|                                    | 71 | 1 | 0.094 | 0 --> 2 |
|                                    | 90 | 1 | 0.067 | 1 ==> 0 |
|                                    | 91 | 1 | 0.125 | 1 ==> 0 |
| node_120 --> Onukia muirii         | 6  | 1 | 0.111 | 2 --> 0 |
|                                    | 79 | 1 | 0.136 | 1 --> 2 |
|                                    | 82 | 1 | 0.118 | 0 ==> 1 |

|                                     |    |   |       |         |
|-------------------------------------|----|---|-------|---------|
|                                     | 83 | 1 | 0.083 | 1 ==> 0 |
|                                     | 87 | 1 | 0.095 | 1 --> 2 |
|                                     | 88 | 1 | 0.074 | 0 ==> 1 |
| node_122 --> Draconirvana siamensis | 2  | 1 | 0.200 | 1 ==> 0 |
|                                     | 7  | 1 | 0.091 | 1 ==> 0 |
|                                     | 10 | 1 | 0.182 | 1 --> 2 |
|                                     | 12 | 1 | 0.143 | 1 ==> 2 |
|                                     | 21 | 1 | 0.333 | 1 ==> 2 |
|                                     | 34 | 1 | 0.250 | 0 --> 1 |
|                                     | 36 | 1 | 0.125 | 0 --> 1 |
|                                     | 47 | 1 | 0.200 | 0 ==> 1 |
|                                     | 69 | 1 | 0.154 | 0 ==> 1 |
|                                     | 71 | 1 | 0.094 | 0 --> 2 |
|                                     | 79 | 1 | 0.136 | 1 --> 2 |
|                                     | 86 | 1 | 0.087 | 1 --> 2 |
| node_126 --> node_125               | 3  | 1 | 0.130 | 2 --> 1 |
|                                     | 4  | 1 | 0.167 | 2 ==> 0 |
|                                     | 11 | 1 | 0.200 | 1 ==> 0 |
|                                     | 19 | 1 | 0.105 | 0 ==> 2 |
|                                     | 28 | 1 | 0.250 | 1 --> 2 |
|                                     | 29 | 1 | 0.286 | 1 --> 0 |
|                                     | 48 | 1 | 0.091 | 0 --> 1 |
|                                     | 50 | 1 | 0.154 | 1 --> 0 |
|                                     | 51 | 1 | 0.200 | 0 --> 1 |
|                                     | 64 | 1 | 0.250 | 1 ==> 0 |
|                                     | 67 | 1 | 0.273 | 1 ==> 0 |
|                                     | 83 | 1 | 0.083 | 1 ==> 0 |
|                                     | 96 | 1 | 0.200 | 1 --> 0 |
| node_125 --> Friscanus friscanus    | 1  | 1 | 0.071 | 0 ==> 1 |
|                                     | 59 | 1 | 0.154 | 1 --> 2 |
|                                     | 79 | 1 | 0.136 | 1 --> 3 |
|                                     | 86 | 1 | 0.087 | 1 --> 0 |
|                                     | 89 | 1 | 0.111 | 0 ==> 2 |
|                                     | 92 | 1 | 0.087 | 1 ==> 0 |
| node_125 --> node_124               | 45 | 1 | 0.125 | 0 --> 1 |
|                                     | 72 | 1 | 0.091 | 0 --> 1 |
|                                     | 90 | 1 | 0.067 | 1 ==> 0 |
|                                     | 91 | 1 | 0.125 | 2 --> 0 |
|                                     | 95 | 1 | 0.250 | 1 ==> 2 |
| node_124 --> Epiacanthus semifuscus | 3  | 1 | 0.130 | 1 ==> 0 |
|                                     | 6  | 1 | 0.111 | 0 ==> 1 |
|                                     | 25 | 1 | 0.182 | 1 ==> 0 |
|                                     | 28 | 1 | 0.250 | 2 --> 1 |
|                                     | 29 | 1 | 0.286 | 0 --> 1 |
|                                     | 48 | 1 | 0.091 | 1 --> 0 |
|                                     | 50 | 1 | 0.154 | 0 --> 1 |
|                                     | 51 | 1 | 0.200 | 1 --> 0 |
|                                     | 79 | 1 | 0.136 | 1 --> 2 |
|                                     | 89 | 1 | 0.111 | 0 ==> 3 |



|                                      |    |   |       |         |
|--------------------------------------|----|---|-------|---------|
|                                      | 92 | 1 | 0.087 | 1 ==> 2 |
| node_124 --> node_123                | 44 | 1 | 0.133 | 1 ==> 2 |
|                                      | 71 | 1 | 0.094 | 3 --> 0 |
|                                      | 91 | 1 | 0.125 | 0 --> 3 |
| node_147 --> node_146                | 2  | 1 | 0.200 | 1 ==> 0 |
|                                      | 23 | 1 | 0.182 | 2 ==> 0 |
|                                      | 26 | 1 | 0.286 | 1 ==> 2 |
|                                      | 42 | 1 | 0.250 | 1 ==> 0 |
|                                      | 44 | 1 | 0.133 | 1 --> 0 |
|                                      | 47 | 1 | 0.200 | 0 ==> 1 |
|                                      | 72 | 1 | 0.091 | 0 --> 1 |
|                                      | 79 | 1 | 0.136 | 1 --> 3 |
|                                      | 87 | 1 | 0.095 | 0 --> 2 |
|                                      | 88 | 1 | 0.074 | 0 --> 1 |
|                                      | 91 | 1 | 0.125 | 2 --> 3 |
|                                      | 98 | 1 | 0.286 | 0 --> 1 |
| node_146 --> node_143                | 4  | 1 | 0.167 | 2 --> 1 |
|                                      | 31 | 1 | 0.300 | 0 ==> 1 |
|                                      | 67 | 1 | 0.273 | 1 ==> 2 |
|                                      | 70 | 1 | 0.125 | 0 ==> 1 |
|                                      | 90 | 1 | 0.067 | 1 ==> 0 |
| node_143 --> node_127                | 18 | 1 | 0.200 | 0 ==> 1 |
|                                      | 53 | 1 | 0.200 | 0 --> 1 |
|                                      | 56 | 1 | 0.077 | 0 ==> 1 |
|                                      | 65 | 1 | 0.250 | 0 ==> 1 |
|                                      | 83 | 1 | 0.083 | 1 ==> 0 |
|                                      | 88 | 1 | 0.074 | 1 ==> 2 |
|                                      | 92 | 1 | 0.087 | 1 ==> 2 |
|                                      | 93 | 1 | 0.333 | 0 ==> 2 |
| node_127 --> Antillonirvana freytagi | 6  | 1 | 0.111 | 0 ==> 1 |
|                                      | 8  | 1 | 0.167 | 0 ==> 1 |
|                                      | 12 | 1 | 0.143 | 1 ==> 2 |
|                                      | 53 | 1 | 0.200 | 1 --> 2 |
|                                      | 71 | 1 | 0.094 | 3 --> 0 |
| node_127 --> Jassosqualus smithii    | 1  | 1 | 0.071 | 0 ==> 1 |
|                                      | 4  | 1 | 0.167 | 1 --> 2 |
|                                      | 5  | 1 | 0.250 | 4 ==> 0 |
|                                      | 7  | 1 | 0.091 | 1 ==> 2 |
|                                      | 19 | 1 | 0.105 | 0 ==> 1 |
|                                      | 91 | 1 | 0.125 | 3 --> 0 |
| node_143 --> node_142                | 3  | 1 | 0.130 | 2 --> 1 |
|                                      | 79 | 1 | 0.136 | 3 --> 2 |
|                                      | 87 | 1 | 0.095 | 2 --> 1 |
|                                      | 96 | 1 | 0.200 | 1 --> 0 |
| node_142 --> node_141                | 72 | 1 | 0.091 | 1 --> 0 |
|                                      | 82 | 1 | 0.118 | 1 --> 0 |
|                                      | 84 | 1 | 0.083 | 1 ==> 0 |
|                                      | 88 | 1 | 0.074 | 1 --> 0 |
|                                      | 91 | 1 | 0.125 | 3 --> 0 |

|                                     |    |       |         |         |
|-------------------------------------|----|-------|---------|---------|
| node_141 --> node_128               | 4  | 1     | 0.167   | 1 ==> 0 |
|                                     | 8  | 1     | 0.167   | 0 ==> 1 |
|                                     | 36 | 1     | 0.125   | 1 ==> 2 |
|                                     | 89 | 1     | 0.111   | 0 ==> 2 |
|                                     | 93 | 1     | 0.333   | 0 ==> 1 |
| node_128 --> Yaoundea semela        | 3  | 1     | 0.130   | 1 ==> 3 |
|                                     | 7  | 1     | 0.091   | 1 ==> 2 |
| node_141 --> node_140               | 19 | 1     | 0.105   | 0 --> 1 |
|                                     | 53 | 1     | 0.200   | 0 --> 1 |
|                                     | 70 | 1     | 0.125   | 1 ==> 0 |
|                                     | 86 | 1     | 0.087   | 0 --> 1 |
|                                     | 92 | 1     | 0.087   | 1 --> 0 |
| node_140 --> node_130               | 1  | 1     | 0.071   | 0 --> 1 |
|                                     | 25 | 1     | 0.182   | 1 --> 2 |
|                                     | 67 | 1     | 0.273   | 2 --> 1 |
|                                     | 74 | 1     | 0.111   | 0 --> 1 |
|                                     | 82 | 1     | 0.118   | 0 --> 1 |
|                                     | 87 | 1     | 0.095   | 1 ==> 0 |
| node_130 --> node_129               | 86 | 1     | 0.087   | 1 --> 2 |
|                                     | 92 | 1     | 0.087   | 0 --> 1 |
| node_129 --> Decursusnirvana excels | 12 | 1     | 0.143   | 1 ==> 0 |
|                                     | 25 | 1     | 0.182   | 2 --> 1 |
|                                     | 34 | 1     | 0.250   | 1 ==> 0 |
|                                     | 36 | 1     | 0.125   | 1 ==> 0 |
|                                     | 48 | 1     | 0.091   | 0 ==> 1 |
|                                     | 50 | 1     | 0.154   | 1 ==> 0 |
|                                     | 53 | 1     | 0.200   | 1 --> 0 |
|                                     | 56 | 1     | 0.077   | 0 ==> 1 |
|                                     | 67 | 1     | 0.273   | 1 --> 2 |
|                                     | 74 | 1     | 0.111   | 1 --> 0 |
| node_129-->Australnirvana adelaidae | 1  | 1     | 0.071   | 1 --> 0 |
|                                     | 3  | 1     | 0.130   | 1 ==> 2 |
|                                     | 4  | 1     | 0.167   | 1 ==> 2 |
|                                     | 5  | 1     | 0.250   | 4 ==> 0 |
|                                     | 7  | 1     | 0.091   | 1 ==> 2 |
|                                     | 31 | 1     | 0.300   | 1 ==> 0 |
|                                     | 47 | 1     | 0.200   | 1 ==> 0 |
|                                     | 71 | 1     | 0.094   | 3 ==> 0 |
|                                     | 79 | 1     | 0.136   | 2 ==> 0 |
|                                     | 81 | 1     | 0.333   | 0 ==> 1 |
|                                     | 83 | 1     | 0.083   | 1 ==> 0 |
|                                     | 93 | 1     | 0.333   | 0 ==> 1 |
|                                     | 99 | 1     | 0.500   | 0 ==> 1 |
| node_130 --> Chudania emeiana       | 4  | 1     | 0.167   | 1 ==> 3 |
|                                     | 19 | 1     | 0.105   | 1 --> 0 |
|                                     | 37 | 1     | 0.250   | 0 ==> 1 |
|                                     | 88 | 1     | 0.074   | 0 ==> 1 |
| 89                                  | 1  | 0.111 | 0 ==> 3 |         |
| node_140 --> node_139               | 44 | 1     | 0.133   | 0 ==> 1 |

|                                |    |   |       |         |
|--------------------------------|----|---|-------|---------|
|                                | 53 | 1 | 0.200 | 1 --> 2 |
|                                | 91 | 1 | 0.125 | 0 ==> 1 |
| node_139 --> Convexfronta guoi | 4  | 1 | 0.167 | 1 ==> 0 |
|                                | 48 | 1 | 0.091 | 0 ==> 1 |
|                                | 53 | 1 | 0.200 | 2 --> 3 |
|                                | 84 | 1 | 0.083 | 0 ==> 1 |
|                                | 86 | 1 | 0.087 | 1 --> 0 |
|                                | 87 | 1 | 0.095 | 1 ==> 2 |
|                                | 89 | 1 | 0.111 | 0 ==> 1 |
| node_139 --> node_138          | 3  | 1 | 0.130 | 1 --> 3 |
|                                | 8  | 1 | 0.167 | 0 ==> 1 |
|                                | 36 | 1 | 0.125 | 1 --> 2 |
|                                | 55 | 1 | 0.500 | 2 ==> 0 |
|                                | 71 | 1 | 0.094 | 3 --> 0 |
|                                | 72 | 1 | 0.091 | 0 ==> 1 |
|                                | 83 | 1 | 0.083 | 1 ==> 0 |
|                                | 90 | 1 | 0.067 | 0 ==> 1 |
| node_138 --> Nirvana suturalis | 7  | 1 | 0.091 | 1 ==> 2 |
|                                | 12 | 1 | 0.143 | 1 ==> 2 |
|                                | 71 | 1 | 0.094 | 0 --> 1 |
|                                | 88 | 1 | 0.074 | 0 ==> 2 |
| node_138 --> node_137          | 92 | 1 | 0.087 | 0 --> 1 |
| node_137 --> node_133          | 70 | 1 | 0.125 | 0 --> 1 |
| node_133 --> node_131          | 3  | 1 | 0.130 | 3 --> 1 |
|                                | 4  | 1 | 0.167 | 1 ==> 2 |
|                                | 5  | 1 | 0.250 | 4 ==> 0 |
|                                | 8  | 1 | 0.167 | 1 ==> 0 |
|                                | 36 | 1 | 0.125 | 2 --> 1 |
|                                | 86 | 1 | 0.087 | 1 ==> 2 |
| node_131 --> Sophonia rosea    | 53 | 1 | 0.200 | 2 ==> 3 |
|                                | 87 | 1 | 0.095 | 1 ==> 0 |
|                                | 92 | 1 | 0.087 | 1 --> 0 |
| node_131 --> Oniella honesta   | 56 | 1 | 0.077 | 0 ==> 1 |
|                                | 79 | 1 | 0.136 | 2 ==> 3 |
|                                | 83 | 1 | 0.083 | 0 ==> 1 |
|                                | 91 | 1 | 0.125 | 1 ==> 2 |
| node_132 --> Concavepla sp.n.  | 3  | 1 | 0.130 | 3 --> 2 |
|                                | 4  | 1 | 0.167 | 1 ==> 0 |
|                                | 56 | 1 | 0.077 | 0 ==> 1 |
|                                | 87 | 1 | 0.095 | 1 ==> 0 |
|                                | 88 | 1 | 0.074 | 0 ==> 1 |
| node_132 --> Sophonia sp.      | 6  | 1 | 0.111 | 0 ==> 1 |
|                                | 7  | 1 | 0.091 | 1 ==> 2 |
|                                | 12 | 1 | 0.143 | 1 ==> 2 |
|                                | 15 | 1 | 0.500 | 0 ==> 1 |
|                                | 19 | 1 | 0.105 | 1 ==> 2 |
|                                | 53 | 1 | 0.200 | 2 ==> 3 |
|                                | 70 | 1 | 0.125 | 1 --> 0 |
|                                | 89 | 1 | 0.111 | 0 ==> 1 |

|                              |    |   |       |         |
|------------------------------|----|---|-------|---------|
|                              | 90 | 1 | 0.067 | 1 ==> 0 |
|                              | 92 | 1 | 0.087 | 1 --> 0 |
| node_137 --> node_136        | 49 | 1 | 0.143 | 0 ==> 1 |
| node_136 --> Ophiuchus sp.n. | 3  | 1 | 0.130 | 3 --> 1 |
|                              | 6  | 1 | 0.111 | 0 ==> 1 |
|                              | 12 | 1 | 0.143 | 1 ==> 2 |
|                              | 36 | 1 | 0.125 | 2 --> 1 |
|                              | 48 | 1 | 0.091 | 0 ==> 1 |
|                              | 90 | 1 | 0.067 | 1 ==> 0 |
|                              | 91 | 1 | 0.125 | 1 ==> 0 |
|                              | 93 | 1 | 0.333 | 0 ==> 1 |
| node_136 --> node_135        | 4  | 1 | 0.167 | 1 ==> 0 |
|                              | 7  | 1 | 0.091 | 1 ==> 2 |
|                              | 71 | 1 | 0.094 | 0 --> 3 |
|                              | 82 | 1 | 0.118 | 0 ==> 1 |
|                              | 83 | 1 | 0.083 | 0 ==> 1 |
|                              | 88 | 1 | 0.074 | 0 ==> 1 |
| node_135 --> node_134        | 43 | 1 | 1.000 | 0 ==> 1 |
|                              | 53 | 1 | 0.200 | 2 ==> 3 |
|                              | 95 | 1 | 0.250 | 1 ==> 0 |
| node_134 --> Kosasia trpica  | 4  | 1 | 0.167 | 0 ==> 2 |
|                              | 5  | 1 | 0.250 | 4 ==> 0 |
|                              | 8  | 1 | 0.167 | 1 ==> 0 |
|                              | 12 | 1 | 0.143 | 1 ==> 2 |
|                              | 19 | 1 | 0.105 | 1 ==> 2 |
|                              | 31 | 1 | 0.300 | 1 ==> 0 |
|                              | 48 | 1 | 0.091 | 0 ==> 2 |
|                              | 49 | 1 | 0.143 | 1 ==> 0 |
|                              | 62 | 1 | 0.250 | 0 ==> 1 |
|                              | 67 | 1 | 0.273 | 2 ==> 0 |
| node_134 --> Kasunga sp.n.   | 3  | 1 | 0.130 | 3 ==> 2 |
| node_142 --> Tortor sp.      | 7  | 1 | 0.091 | 1 ==> 0 |
|                              | 36 | 1 | 0.125 | 1 ==> 0 |
|                              | 44 | 1 | 0.133 | 0 ==> 1 |
|                              | 67 | 1 | 0.273 | 2 ==> 0 |
| node_146 --> node_145        | 7  | 1 | 0.091 | 1 ==> 2 |
|                              | 45 | 1 | 0.125 | 0 --> 1 |
|                              | 92 | 1 | 0.087 | 1 --> 0 |
| node_145 --> node_144        | 4  | 1 | 0.167 | 2 ==> 0 |
|                              | 8  | 1 | 0.167 | 0 ==> 1 |
|                              | 81 | 1 | 0.333 | 0 ==> 1 |
|                              | 87 | 1 | 0.095 | 2 --> 0 |
| node_144 --> Tahura brevis   | 1  | 1 | 0.071 | 0 ==> 1 |
|                              | 15 | 1 | 0.500 | 0 ==> 1 |
|                              | 25 | 1 | 0.182 | 1 ==> 2 |
|                              | 31 | 1 | 0.300 | 0 ==> 1 |
|                              | 36 | 1 | 0.125 | 1 ==> 2 |
|                              | 45 | 1 | 0.125 | 1 --> 0 |
|                              | 47 | 1 | 0.200 | 1 ==> 0 |

|                             |    |   |       |         |
|-----------------------------|----|---|-------|---------|
|                             | 50 | 1 | 0.154 | 1 ==> 0 |
|                             | 53 | 1 | 0.200 | 0 ==> 2 |
|                             | 56 | 1 | 0.077 | 0 ==> 1 |
|                             | 71 | 1 | 0.094 | 3 --> 0 |
|                             | 83 | 1 | 0.083 | 1 ==> 0 |
|                             | 86 | 1 | 0.087 | 0 ==> 2 |
| node_144 --> Neonirvana sp. | 7  | 1 | 0.091 | 2 ==> 0 |
|                             | 19 | 1 | 0.105 | 0 ==> 1 |
|                             | 44 | 1 | 0.133 | 0 ==> 1 |
|                             | 66 | 1 | 1.000 | 0 ==> 1 |
|                             | 73 | 1 | 0.333 | 0 ==> 1 |
|                             | 82 | 1 | 0.118 | 1 ==> 0 |
|                             | 84 | 1 | 0.083 | 1 ==> 0 |
|                             | 88 | 1 | 0.074 | 1 --> 0 |
|                             | 90 | 1 | 0.067 | 1 ==> 0 |
|                             | 92 | 1 | 0.087 | 0 --> 1 |
|                             | 93 | 1 | 0.333 | 0 ==> 1 |
|                             | 95 | 1 | 0.250 | 1 ==> 2 |
|                             | 96 | 1 | 0.200 | 1 --> 0 |
| node_145 --> Narecho sp.    | 5  | 1 | 0.250 | 4 ==> 1 |
|                             | 12 | 1 | 0.143 | 1 ==> 2 |
|                             | 19 | 1 | 0.105 | 0 ==> 2 |
|                             | 71 | 1 | 0.094 | 3 ==> 1 |
|                             | 72 | 1 | 0.091 | 1 --> 0 |
|                             | 89 | 1 | 0.111 | 0 ==> 2 |
|                             | 91 | 1 | 0.125 | 3 --> 1 |
|                             | 98 | 1 | 0.286 | 1 --> 0 |
| node_150 --> node_149       | 5  | 1 | 0.250 | 4 --> 0 |
|                             | 7  | 1 | 0.091 | 1 --> 0 |
|                             | 12 | 1 | 0.143 | 1 ==> 2 |
|                             | 16 | 1 | 0.167 | 0 --> 1 |
|                             | 19 | 1 | 0.105 | 0 --> 1 |
|                             | 44 | 1 | 0.133 | 1 --> 2 |
|                             | 79 | 1 | 0.136 | 1 --> 0 |
|                             | 98 | 1 | 0.286 | 0 ==> 2 |
| node_149 --> node_148       | 1  | 1 | 0.071 | 0 ==> 1 |
|                             | 2  | 1 | 0.200 | 1 ==> 0 |
|                             | 13 | 1 | 0.143 | 0 ==> 1 |
|                             | 20 | 1 | 1.000 | 0 ==> 1 |
|                             | 25 | 1 | 0.182 | 1 ==> 2 |
|                             | 26 | 1 | 0.286 | 1 ==> 2 |
|                             | 29 | 1 | 0.286 | 1 --> 0 |
|                             | 30 | 1 | 0.167 | 1 ==> 0 |
|                             | 31 | 1 | 0.300 | 0 ==> 2 |
|                             | 36 | 1 | 0.125 | 1 --> 2 |
|                             | 50 | 1 | 0.154 | 1 ==> 0 |
|                             | 59 | 1 | 0.154 | 2 --> 0 |
|                             | 60 | 1 | 1.000 | 0 ==> 1 |
|                             | 63 | 1 | 0.600 | 1 ==> 2 |

|                                  |    |   |       |         |
|----------------------------------|----|---|-------|---------|
|                                  | 82 | 1 | 0.118 | 1 ==> 0 |
|                                  | 83 | 1 | 0.083 | 1 ==> 2 |
|                                  | 90 | 1 | 0.067 | 1 ==> 0 |
|                                  | 91 | 1 | 0.125 | 1 --> 0 |
|                                  | 92 | 1 | 0.087 | 1 ==> 0 |
|                                  | 95 | 1 | 0.250 | 1 ==> 0 |
| node_148 --> Balbilus sp.        | 28 | 1 | 0.250 | 1 ==> 2 |
|                                  | 79 | 1 | 0.136 | 0 ==> 3 |
| node_148 --> Stenotortor sp.     | 16 | 1 | 0.167 | 1 --> 0 |
|                                  | 86 | 1 | 0.087 | 0 ==> 2 |
|                                  | 88 | 1 | 0.074 | 0 ==> 1 |
| node_149 --> Pentoffia sp.       | 5  | 1 | 0.250 | 0 --> 3 |
|                                  | 7  | 1 | 0.091 | 0 --> 2 |
|                                  | 19 | 1 | 0.105 | 1 --> 2 |
|                                  | 21 | 1 | 0.333 | 1 ==> 0 |
|                                  | 41 | 1 | 0.167 | 0 --> 1 |
|                                  | 45 | 1 | 0.125 | 0 --> 1 |
|                                  | 48 | 1 | 0.091 | 1 --> 2 |
|                                  | 64 | 1 | 0.250 | 1 ==> 0 |
|                                  | 65 | 1 | 0.250 | 0 ==> 1 |
|                                  | 69 | 1 | 0.154 | 2 --> 1 |
|                                  | 73 | 1 | 0.333 | 0 ==> 1 |
|                                  | 86 | 1 | 0.087 | 0 ==> 1 |
|                                  | 87 | 1 | 0.095 | 0 ==> 1 |
|                                  | 96 | 1 | 0.200 | 1 --> 0 |
|                                  | 97 | 1 | 0.667 | 0 ==> 1 |
| node_153 --> node_152            | 24 | 1 | 0.500 | 0 ==> 1 |
|                                  | 32 | 1 | 0.500 | 0 --> 1 |
|                                  | 33 | 1 | 0.500 | 1 ==> 0 |
|                                  | 44 | 1 | 0.133 | 1 --> 0 |
|                                  | 50 | 1 | 0.154 | 1 ==> 0 |
|                                  | 52 | 1 | 0.400 | 1 ==> 0 |
|                                  | 54 | 1 | 0.667 | 0 ==> 2 |
|                                  | 55 | 1 | 0.500 | 2 ==> 0 |
|                                  | 58 | 1 | 0.333 | 0 ==> 1 |
|                                  | 65 | 1 | 0.250 | 0 ==> 1 |
|                                  | 67 | 1 | 0.273 | 1 ==> 3 |
|                                  | 74 | 1 | 0.111 | 0 ==> 1 |
|                                  | 83 | 1 | 0.083 | 1 ==> 0 |
| node_152 --> Alebra albostriella | 21 | 1 | 0.333 | 1 ==> 0 |
|                                  | 59 | 1 | 0.154 | 0 ==> 2 |
|                                  | 71 | 1 | 0.094 | 0 --> 3 |
|                                  | 92 | 1 | 0.087 | 1 ==> 0 |
|                                  | 95 | 1 | 0.250 | 1 ==> 0 |
| node_152 --> Empoasca fabae      | 26 | 1 | 0.286 | 1 ==> 0 |
|                                  | 30 | 1 | 0.167 | 1 ==> 0 |
|                                  | 51 | 1 | 0.200 | 0 ==> 1 |
|                                  | 90 | 1 | 0.067 | 1 ==> 0 |
|                                  | 91 | 1 | 0.125 | 1 --> 3 |

|                             |     |   |       |         |
|-----------------------------|-----|---|-------|---------|
| node_155 --> node_154       | 21  | 1 | 0.333 | 1 ==> 2 |
|                             | 38  | 1 | 1.000 | 0 ==> 1 |
|                             | 40  | 1 | 1.000 | 0 ==> 1 |
|                             | 42  | 1 | 0.250 | 1 ==> 2 |
|                             | 57  | 1 | 0.333 | 0 --> 1 |
|                             | 63  | 1 | 0.600 | 1 --> 3 |
|                             | 72  | 1 | 0.091 | 0 --> 1 |
|                             | 76  | 1 | 0.333 | 1 --> 0 |
|                             | 88  | 1 | 0.074 | 0 ==> 1 |
|                             | 92  | 1 | 0.087 | 1 ==> 0 |
|                             | 95  | 1 | 0.250 | 1 ==> 2 |
| node_154 --> Phlogis sp.    | 1   | 1 | 0.071 | 0 ==> 1 |
|                             | 22  | 1 | 0.400 | 2 ==> 0 |
|                             | 26  | 1 | 0.286 | 1 ==> 2 |
|                             | 30  | 1 | 0.167 | 1 ==> 0 |
|                             | 36  | 1 | 0.125 | 0 ==> 1 |
|                             | 41  | 1 | 0.167 | 0 --> 1 |
|                             | 46  | 1 | 0.167 | 0 ==> 1 |
|                             | 52  | 1 | 0.400 | 1 ==> 2 |
|                             | 65  | 1 | 0.250 | 0 ==> 1 |
|                             | 89  | 1 | 0.111 | 0 ==> 3 |
| node_154 --> Signoretia sp. | 4   | 1 | 0.167 | 2 ==> 3 |
|                             | 5   | 1 | 0.250 | 4 ==> 0 |
|                             | 6   | 1 | 0.111 | 0 ==> 2 |
|                             | 9   | 1 | 0.333 | 0 ==> 1 |
|                             | 11  | 1 | 0.200 | 0 ==> 1 |
|                             | 23  | 1 | 0.182 | 1 --> 0 |
|                             | 29  | 1 | 0.286 | 0 ==> 2 |
|                             | 44  | 1 | 0.133 | 1 --> 0 |
|                             | 62  | 1 | 0.250 | 0 ==> 1 |
|                             | 71  | 1 | 0.094 | 0 --> 3 |
|                             | 74  | 1 | 0.111 | 0 ==> 1 |
|                             | 86  | 1 | 0.087 | 0 ==> 1 |
|                             | 90  | 1 | 0.067 | 1 ==> 0 |
|                             | 91  | 1 | 0.125 | 1 --> 0 |
|                             | 99  | 1 | 0.500 | 0 ==> 1 |
|                             | 100 | 1 | 0.333 | 0 ==> 1 |
| node_158 --> node_157       | 1   | 1 | 0.071 | 0 ==> 1 |
|                             | 10  | 1 | 0.182 | 0 --> 2 |
|                             | 19  | 1 | 0.105 | 0 --> 1 |
|                             | 22  | 1 | 0.400 | 2 --> 1 |
|                             | 23  | 1 | 0.182 | 1 --> 0 |
|                             | 24  | 1 | 0.500 | 0 ==> 1 |
|                             | 25  | 1 | 0.182 | 2 --> 0 |
|                             | 26  | 1 | 0.286 | 1 ==> 0 |
|                             | 39  | 1 | 1.000 | 0 ==> 1 |
|                             | 52  | 1 | 0.400 | 1 --> 0 |
|                             | 88  | 1 | 0.074 | 0 ==> 2 |
|                             | 95  | 1 | 0.250 | 1 ==> 0 |

|                                      |    |   |       |         |
|--------------------------------------|----|---|-------|---------|
|                                      | 97 | 1 | 0.667 | 0 --> 2 |
|                                      | 98 | 1 | 0.286 | 0 --> 2 |
| node_157 --> Equeefa castlenau       | 4  | 1 | 0.167 | 2 ==> 3 |
|                                      | 44 | 1 | 0.133 | 1 --> 2 |
|                                      | 45 | 1 | 0.125 | 1 --> 0 |
|                                      | 48 | 1 | 0.091 | 0 ==> 1 |
|                                      | 49 | 1 | 0.143 | 0 ==> 1 |
|                                      | 50 | 1 | 0.154 | 1 ==> 0 |
|                                      | 63 | 1 | 0.600 | 0 ==> 2 |
|                                      | 68 | 1 | 0.200 | 0 ==> 1 |
|                                      | 85 | 1 | 0.250 | 1 ==> 0 |
| node_157 --> node_156                | 91 | 1 | 0.125 | 0 ==> 2 |
|                                      | 5  | 1 | 0.250 | 4 ==> 3 |
|                                      | 34 | 1 | 0.250 | 0 --> 2 |
|                                      | 52 | 1 | 0.400 | 0 --> 2 |
|                                      | 56 | 1 | 0.077 | 0 --> 1 |
|                                      | 71 | 1 | 0.094 | 0 --> 3 |
|                                      | 79 | 1 | 0.136 | 0 --> 1 |
|                                      | 83 | 1 | 0.083 | 1 ==> 2 |
|                                      | 90 | 1 | 0.067 | 1 ==> 0 |
| node_156 --> Coelidia sp.            | 6  | 1 | 0.111 | 0 ==> 1 |
|                                      | 9  | 1 | 0.333 | 0 ==> 1 |
|                                      | 11 | 1 | 0.200 | 0 ==> 1 |
|                                      | 19 | 1 | 0.105 | 1 --> 0 |
|                                      | 21 | 1 | 0.333 | 1 ==> 2 |
|                                      | 31 | 1 | 0.300 | 0 ==> 1 |
|                                      | 37 | 1 | 0.250 | 1 ==> 0 |
|                                      | 42 | 1 | 0.250 | 1 ==> 2 |
|                                      | 67 | 1 | 0.273 | 1 ==> 2 |
|                                      | 89 | 1 | 0.111 | 0 ==> 1 |
|                                      | 98 | 1 | 0.286 | 2 --> 0 |
| node_156 --> Jikradia olitoria       | 3  | 1 | 0.130 | 0 ==> 1 |
|                                      | 22 | 1 | 0.400 | 1 --> 2 |
|                                      | 23 | 1 | 0.182 | 0 --> 1 |
|                                      | 25 | 1 | 0.182 | 0 ==> 1 |
|                                      | 29 | 1 | 0.286 | 0 ==> 2 |
|                                      | 69 | 1 | 0.154 | 0 ==> 2 |
|                                      | 74 | 1 | 0.111 | 0 ==> 1 |
|                                      | 81 | 1 | 0.333 | 0 ==> 1 |
|                                      | 97 | 1 | 0.667 | 2 --> 0 |
| node_159 --> Neocoelidia tumidifrons | 3  | 1 | 0.130 | 0 ==> 2 |
|                                      | 5  | 1 | 0.250 | 4 ==> 0 |
|                                      | 27 | 1 | 1.000 | 0 ==> 1 |
|                                      | 34 | 1 | 0.250 | 0 --> 1 |
|                                      | 36 | 1 | 0.125 | 0 ==> 2 |
|                                      | 44 | 1 | 0.133 | 1 --> 2 |
|                                      | 50 | 1 | 0.154 | 1 ==> 0 |
|                                      | 51 | 1 | 0.200 | 0 --> 1 |
|                                      | 56 | 1 | 0.077 | 0 --> 1 |



|    |   |       |         |
|----|---|-------|---------|
| 71 | 1 | 0.094 | 0 --> 1 |
| 77 | 1 | 1.000 | 0 ==> 1 |
| 78 | 1 | 1.000 | 0 ==> 1 |
| 79 | 1 | 0.136 | 0 --> 2 |
| 80 | 1 | 1.000 | 2 --> 3 |
| 86 | 1 | 0.087 | 0 --> 2 |
| 90 | 1 | 0.067 | 1 ==> 0 |

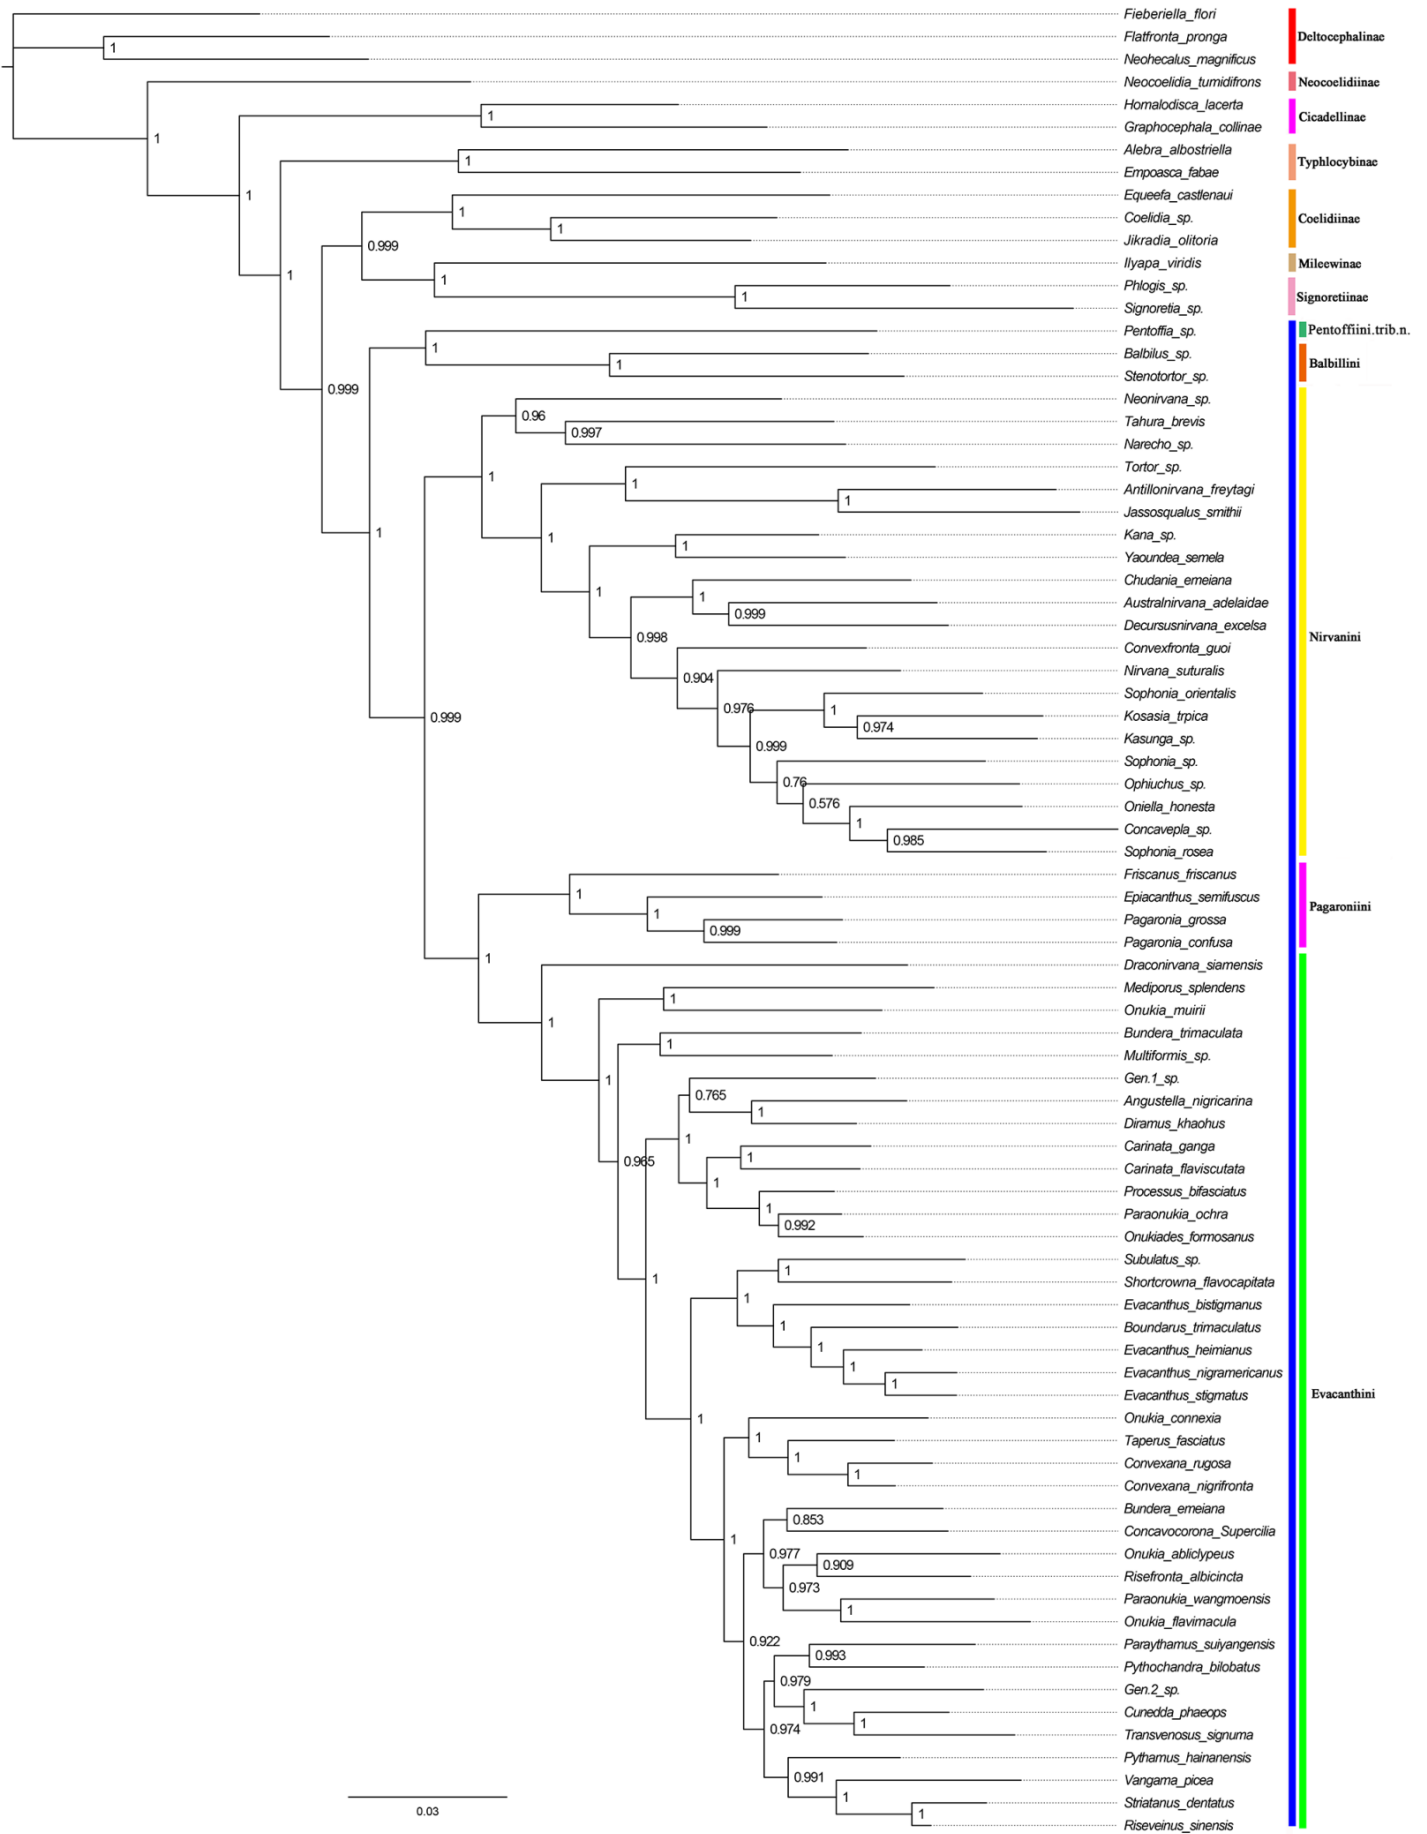

**Supplementary Figure S1.** Bayesian consensus tree based on combined dataset. Each node is documented with its posterior probability (PP) value.

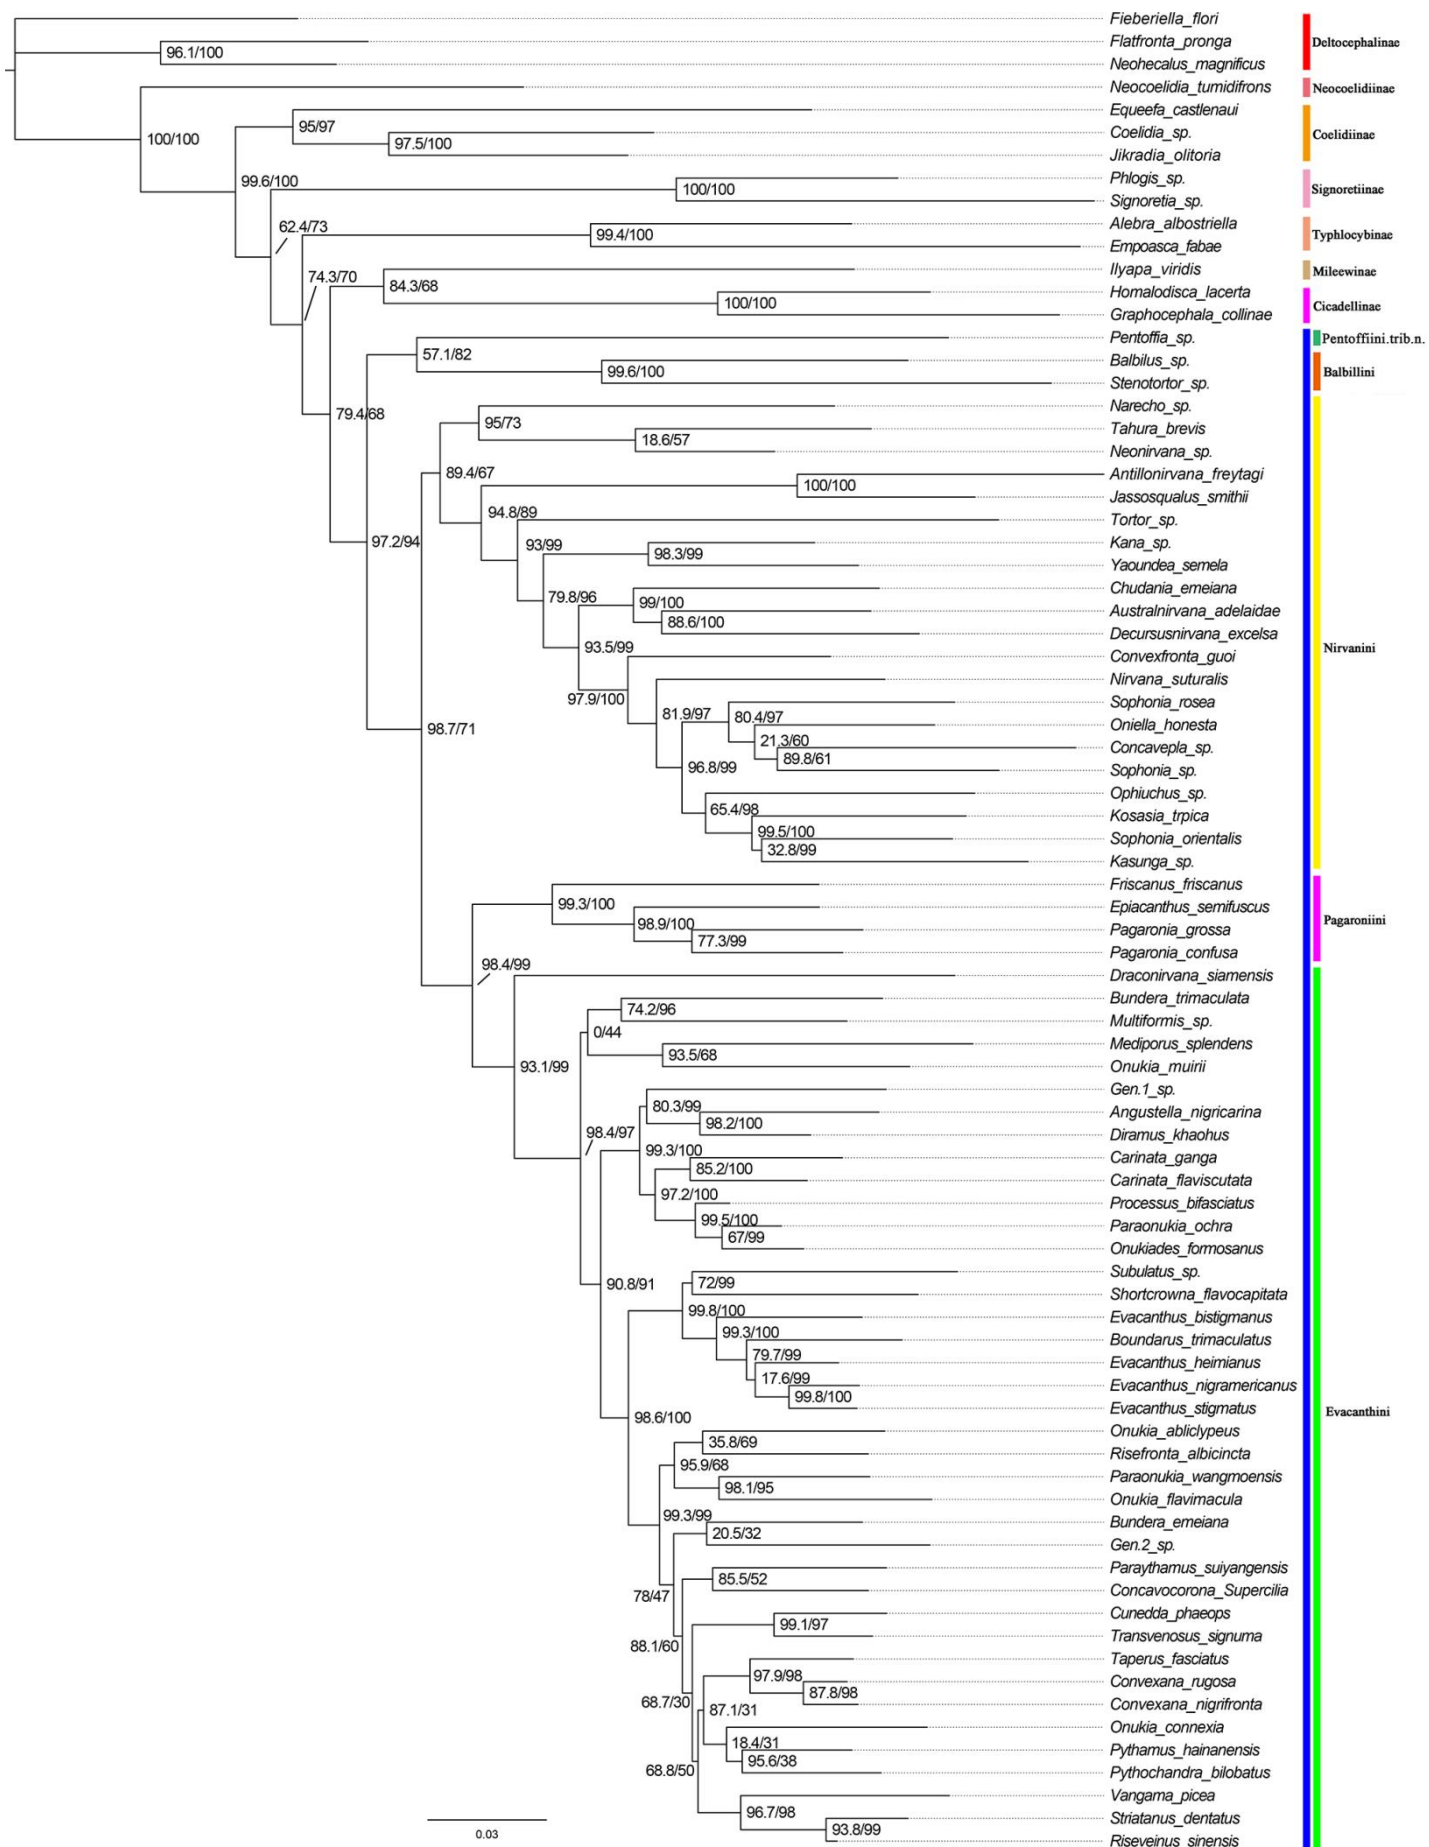

Supplementary Figure S2. Maximum-likelihood (ML) tree estimated from the molecular data only. At each node, values indicate ML support: SH-like approximate likelihood ratio test (SH-aLRT) / ultrafast bootstrap (UFB).

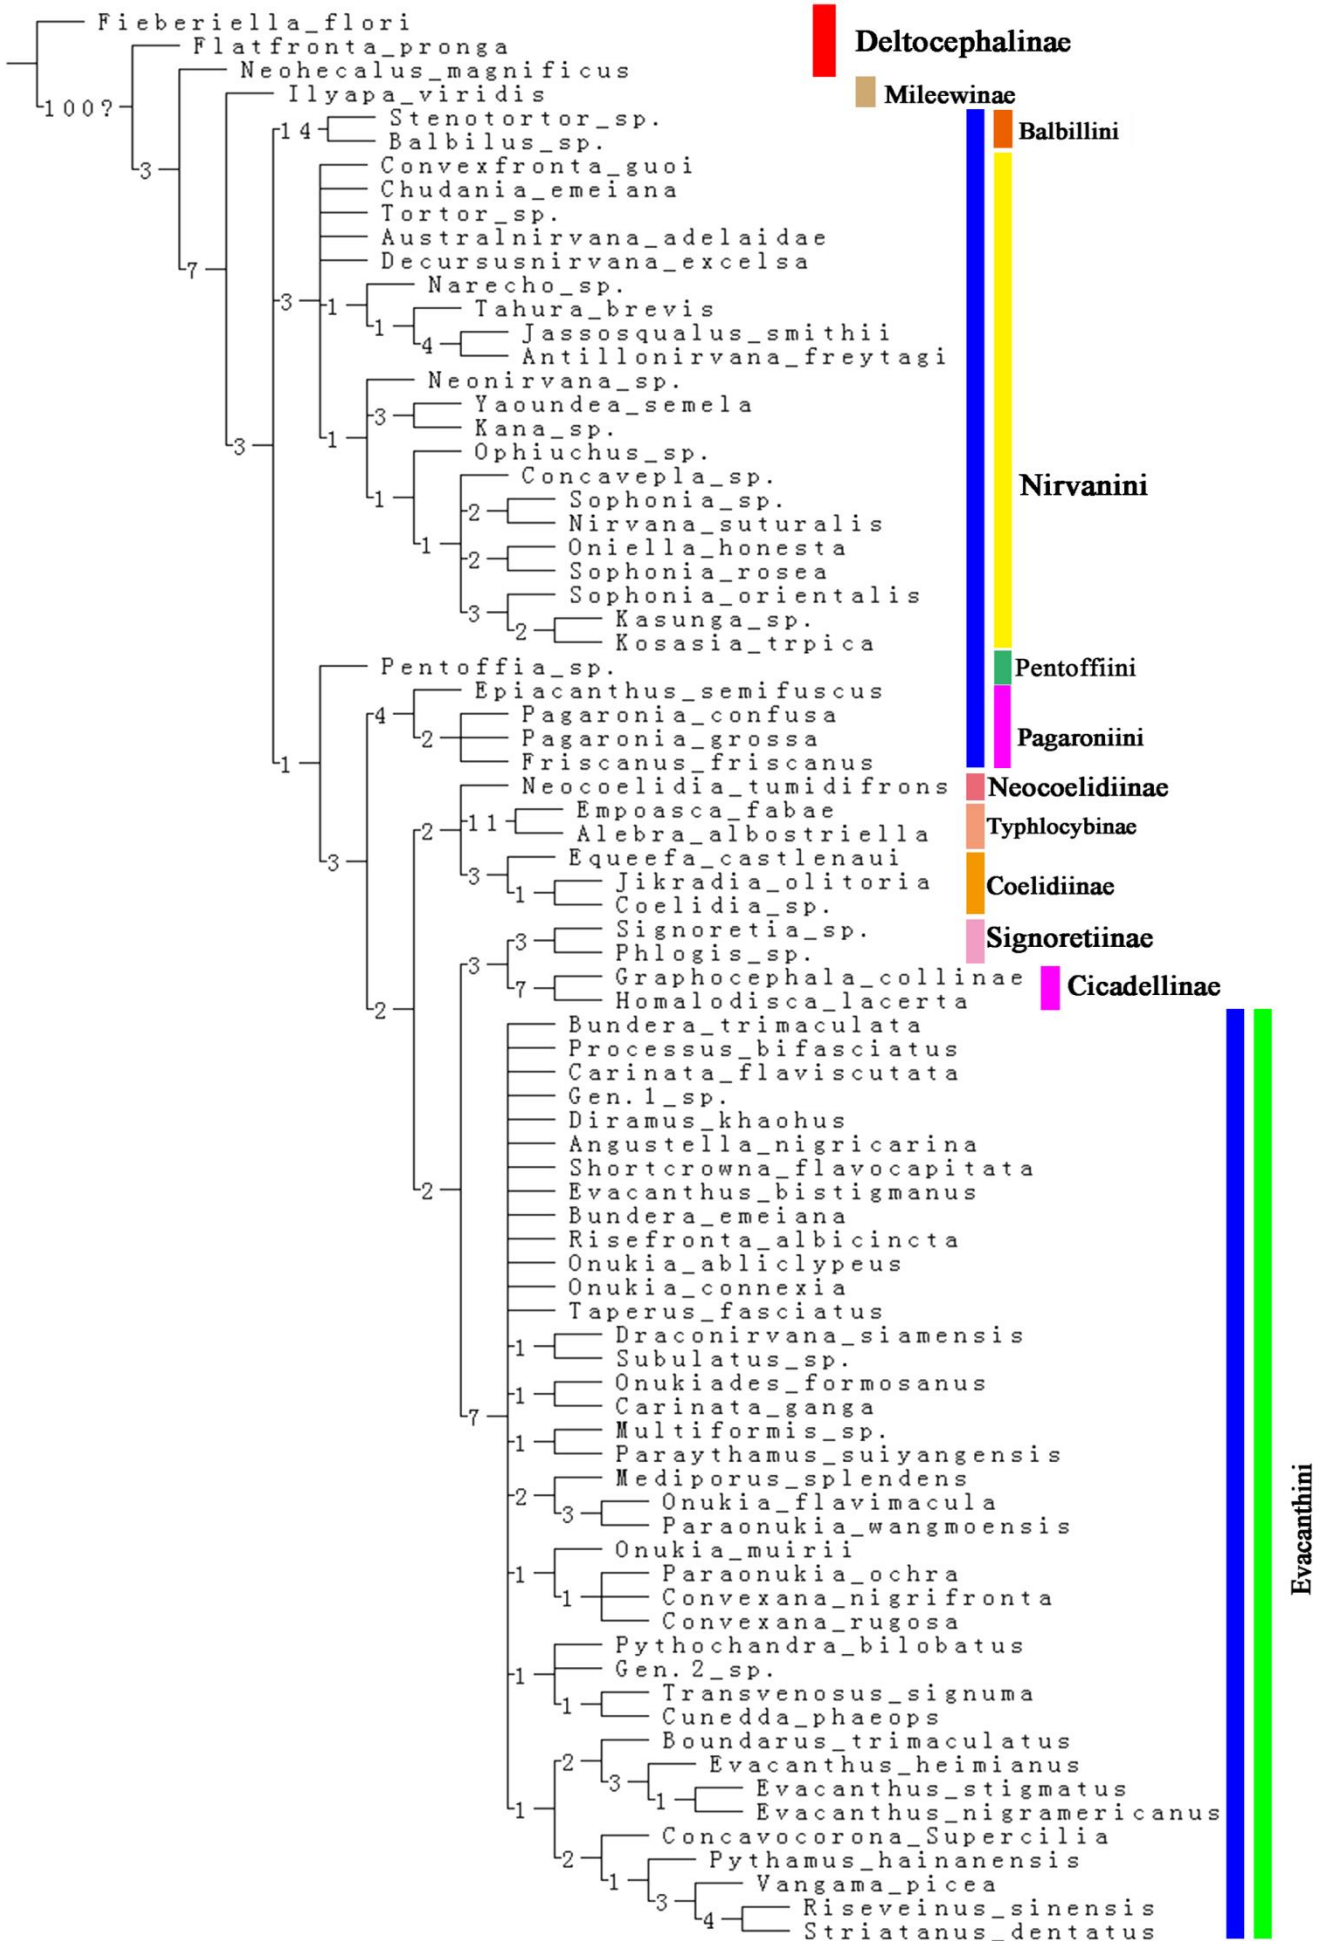

**Supplementary Figure S3.** Maximum parsimony (MP) tree estimated from the morphological data only. At each node, values indicate Bremer support.

**Supplementary Table S1.** List of taxa and DNA sequences included in the study.

| Species                         | Family / Tribe             | Voucher ID | GenBank Accession numbers |            |          |          |           |
|---------------------------------|----------------------------|------------|---------------------------|------------|----------|----------|-----------|
|                                 |                            |            | 28S D2                    | 28S D9-D10 | H3       | Wg       | COI       |
| <i>Fieberiella flori</i>        | Deltocephalinae            | LH23       | AF304594*                 | AF304594*  | KY302493 | -        | KR036227* |
| <i>Flatfronta pronga</i>        | Deltocephalinae            | WY151      | KY302363                  | KY302428   | KY302494 | KY302560 | KY264054  |
| <i>Neohecalus magnificus</i>    | Deltocephalinae            | WY153      | KY302364                  | KY302429   | KY302495 | KY302621 | -         |
| <i>Homalodisca lacerta</i>      | Cicadellinae               | LH97       | AF304669*                 | AF304669*  | KY302496 | KY302561 | KY264055  |
| <i>Graphocephala collinae</i>   | Cicadellinae               | LH15       | KY451730                  | KY451736   | KY302497 | KY302562 | KY264056  |
| <i>Equeefa castlenauai</i>      | Coelidiinae                | LH170      | KY451731                  | KY451737   | KY302498 | KY302563 | KY264057  |
| <i>Coelidia</i> sp.             | Coelidiinae                | LH184      | KY451732                  | KY451738   | -        | -        | KY264058  |
| <i>Neocoelidia tumidifrons</i>  | Neocoelidiinae             | LH64       | AF304602*                 | AF304602*  | KY302499 | KY302623 | KR040768* |
| <i>Jikradia olitoria</i>        | Coelidiinae                | LH24       | AF304598*                 | AF304598*  | KY302500 | -        | KY264059  |
| <i>Ilyapa viridis</i>           | Mileewinae                 | PR202      | KY451733                  | KY451739   | KY302501 | KY302564 | KY264060  |
| <i>Phlogis</i> sp.              | Signoretiinae              | LH194      | KY451734                  | KY451740   | KY302502 | KY302565 | KY264061  |
| <i>Signoretia</i> sp.           | Signoretiinae              | LH193      | KY451735                  | KY451741   | KY302503 | KY302566 | KY264062  |
| <i>Alebra albostriella</i>      | Typhlocybinae              | LH98       | AF304643*                 | AF304643*  | KY302504 | -        | -         |
| <i>Empoasca fabae</i>           | Typhlocybinae              | LH32       | AF304640*                 | AF304640*  | KY302505 | KY302567 | KY264063  |
| <i>Pentoffia</i> sp.            | Pentoffiini <b>trib.n.</b> | WY166      | KY302365                  | KY302430   | -        | -        | KY264064  |
| <i>Balbilus</i> sp.             | Balbillini                 | WY131      | KY302366                  | KY302431   | -        | KY302568 | KY264065  |
| <i>Stenotortor</i> sp.          | Balbillini                 | WY130      | KY302367                  | KY302432   | -        | KY302569 | KY264066  |
| <i>Tahura brevis</i>            | Nirvanini                  | WY128      | KY302379                  | KY302444   | -        | KY302579 | KY264080  |
| <i>Nirvana suturalis</i>        | Nirvanini                  | WY124      | KY302380                  | KY302445   | KY302518 | KY302580 | KY264081  |
| <i>Chudania emeiana</i>         | Nirvanini                  | WY127      | KY302381                  | KY302446   | KY302519 | KY302581 | KY264082  |
| <i>Concavepla</i> sp.           | Nirvanini                  | WY126      | KY302382                  | KY302447   | KY302520 | -        | KY264083  |
| <i>Oniella honesta</i>          | Nirvanini                  | WY52       | KY302383                  | KY302448   | KY302521 | -        | KY264084  |
| <i>Australnirvana adelaidae</i> | Nirvanini                  | LH46       | AF304635*                 | AF304635*  | KY302522 | KY302582 | KY264085  |
| <i>Ophiuchus</i> sp.            | Nirvanini                  | WY144      | KY302413                  | KY302478   | KY302547 | KY302609 | KY264110  |
| <i>Sophonias</i> sp.            | Nirvanini                  | WY125      | KY302414                  | KY302479   | KY302548 | -        | KY264111  |
| <i>Sophonias rosea</i>          | Nirvanini                  | WY149      | KY302415                  | KY302480   | KY302549 | KY302610 | KY264112  |

|                                  |             |       |           |           |          |          |          |
|----------------------------------|-------------|-------|-----------|-----------|----------|----------|----------|
| <i>Convexfronta guoi</i>         | Nirvanini   | WY150 | KY302416  | KY302481  | KY302550 | KY302611 | KY264113 |
| <i>Antillonirvana freytagi</i>   | Nirvanini   | WY152 | KY302417  | KY302482  | -        | KY302612 | KY264114 |
| <i>Jassosqualus smithii</i>      | Nirvanini   | WY159 | KY302418  | KY302483  | KY302551 | KY302613 | -        |
| <i>Kana</i> sp.                  | Nirvanini   | WY154 | KY302419  | KY302484  | -        | KY302614 | KY264115 |
| <i>Yaoundea semela</i>           | Nirvanini   | WY163 | KY302420  | KY302485  | KY302552 | KY302615 | KY264116 |
| <i>Decursusnirvana excelsa</i>   | Nirvanini   | WY157 | KY302421  | KY302486  | KY302553 | KY302616 | KY264117 |
| <i>Sophonina orientalis</i>      | Nirvanini   | WY54  | KY302422  | KY302487  | KY302554 | KY302625 | KY264118 |
| <i>Kosasia trpica</i>            | Nirvanini   | WY160 | KY302423  | KY302488  | KY302555 | KY302617 | KY264119 |
| <i>Neonirvana</i> sp.            | Nirvanini   | WY161 | KY302424  | KY302489  | KY302556 | KY302618 | -        |
| <i>Kasunga</i> sp.               | Nirvanini   | WY162 | KY302425  | KY302490  | KY302557 | -        | KY264120 |
| <i>Tortor</i> sp.                | Nirvanini   | WY165 | KY302426  | KY302491  | KY302558 | KY302619 | KY264121 |
| <i>Narecho</i> sp.               | Nirvanini   | WY164 | KY302427  | KY302492  | KY302559 | KY302620 | KY264122 |
| <i>Pagaronia grossa</i>          | Pagaroniini | WY122 | KY302378  | KY302443  | -        | KY302577 | KY264078 |
| <i>Pagaronia confusa</i>         | Pagaroniini | LH57  | AF304605* | AF304605* | KY302517 | KY302578 | KY264079 |
| <i>Epiacanthus semifuscus</i>    | Pagaroniini | WY102 | KY302412  | KY302477  | KY302546 | KY302608 | KY264109 |
| <i>Friscanus friscanus</i>       | Pagaroniini | LH54  | AF304595* | AF304595* | KY302506 | -        | KY264067 |
| <i>Striatanus dentatus</i>       | Evacanthini | WY27  | KY302368  | KY302433  | KY302507 | KY302570 | KY264068 |
| <i>Evacanthus nigramericanus</i> | Evacanthini | LH82  | AF304591* | AF304591* | KY302508 | KY302622 | KY264069 |
| <i>Evacanthus stigmatus</i>      | Evacanthini | WY107 | KY302369  | KY302434  | KY302509 | KY302571 | KY264070 |
| <i>Evacanthus heimianus</i>      | Evacanthini | WY116 | KY302370  | KY302435  | KY302510 | KY302572 | KY264071 |
| <i>Angustella nigricarina</i>    | Evacanthini | WY103 | KY302371  | KY302436  | KY302511 | -        | KY264072 |
| <i>Carinata ganga</i>            | Evacanthini | WY104 | KY302372  | KY302437  | KY302512 | KY302624 | KY264073 |
| <i>Diramus khaohus</i>           | Evacanthini | WY115 | KY302373  | KY302438  | KY302513 | KY302573 | KY264074 |
| <i>Draconirvana siamensis</i>    | Evacanthini | WY113 | KY302374  | KY302439  | -        | -        | KY264075 |
| <i>Gen.1</i> sp.                 | Evacanthini | WY109 | KY302375  | KY302440  | KY302514 | KY302574 | KY264076 |
| <i>Cunedda phaeops</i>           | Evacanthini | WY105 | KY302376  | KY302441  | KY302515 | KY302575 | KY264077 |
| <i>Transvenosus signuma</i>      | Evacanthini | WY108 | KY302377  | KY302442  | KY302516 | KY302576 | -        |
| <i>Pagaronia grossa</i>          | Pagaroniini | WY122 | KY302378  | KY302443  | -        | KY302577 | KY264078 |
| <i>Pagaronia confusa</i>         | Pagaroniini | LH57  | AF304605* | AF304605* | KY302517 | KY302578 | KY264079 |
| <i>Onukia abliclypeus</i>        | Evacanthini | WY110 | KY302384  | KY302449  | KY302523 | -        | KY264086 |

|                                  |             |       |          |          |          |          |           |
|----------------------------------|-------------|-------|----------|----------|----------|----------|-----------|
| <i>Taperus fasciatus</i>         | Evacanthini | WY119 | KY302385 | KY302450 | KY302524 | KY302583 | KY264087  |
| <i>Pythamus hainanensis</i>      | Evacanthini | WY114 | KY302386 | KY302451 | -        | KY302584 | KY264088  |
| <i>Vangama picea</i>             | Evacanthini | WY120 | KY302387 | KY302452 | KY302525 | KY302585 | KY264089  |
| <i>Paraythamus suiyangensis</i>  | Evacanthini | WY25  | KY302388 | KY302453 | KY302526 | KY302586 | KY264090  |
| <i>Subulatus</i> sp.             | Evacanthini | WY60  | KY302389 | KY302454 | KY302527 | KY302587 | KY264091  |
| <i>Paraonukia wangmoensis</i>    | Evacanthini | WY63  | KY302390 | KY302455 | KY302528 | KY302588 | KY264092  |
| <i>Risefronta albicincta</i>     | Evacanthini | WY118 | KY302391 | KY302456 | KY302529 | KY302589 | KY264093  |
| <i>Bundera trimaculata</i>       | Evacanthini | 53-1  | KY302392 | KY302457 | KY302530 | KY302590 | KT183659* |
| <i>Bundera emeiana</i>           | Evacanthini | 23-2  | KY302393 | KY302458 | KY302531 | -        | KT183628* |
| <i>Concavocorona Supercilia</i>  | Evacanthini | WY46  | KY302394 | KY302459 | KY302532 | KY302591 | KY264094  |
| <i>Gen.2</i> sp.                 | Evacanthini | WY132 | KY302395 | KY302460 | -        | KY302592 | KY264095  |
| <i>Boundarus trimaculatus</i>    | Evacanthini | WY133 | KY302396 | KY302461 | -        | KY302593 | KY264096  |
| <i>Convexana rugosa</i>          | Evacanthini | WY136 | KY302397 | KY302462 | KY302533 | KY302594 | -         |
| <i>Mediporus splendens</i>       | Evacanthini | WY137 | KY302398 | KY302463 | KY302534 | -        | KY264097  |
| <i>Carinata flaviscutata</i>     | Evacanthini | WY134 | KY302399 | KY302464 | KY302535 | KY302595 | KY264098  |
| <i>Convexana nigrifronta</i>     | Evacanthini | WY135 | KY302400 | KY302465 | KY302536 | KY302596 | KY264099  |
| <i>Riseveinus sinensis</i>       | Evacanthini | WY143 | KY302401 | KY302466 | KY302537 | KY302597 | -         |
| <i>Processus bifasciatus</i>     | Evacanthini | WY142 | KY302402 | KY302467 | KY302538 | KY302598 | -         |
| <i>Onukia muirii</i>             | Evacanthini | WY141 | KY302403 | KY302468 | KY302539 | KY302599 | KY264100  |
| <i>Paraonukia ochra</i>          | Evacanthini | WY140 | KY302404 | KY302469 | KY302540 | KY302600 | KY264101  |
| <i>Onukia flavimacula</i>        | Evacanthini | WY138 | KY302405 | KY302470 | KY302541 | KY302601 | KY264102  |
| <i>Onukiades formosanus</i>      | Evacanthini | WY139 | KY302406 | KY302471 | KY302542 | KY302602 | KY264103  |
| <i>Multiformis</i> sp.           | Evacanthini | WY146 | KY302407 | KY302472 | -        | KY302603 | KY264104  |
| <i>Pythochandra bilobatus</i>    | Evacanthini | WY145 | KY302408 | KY302473 | -        | KY302604 | KY264105  |
| <i>Shortcrowna flavocapitata</i> | Evacanthini | WY147 | KY302409 | KY302474 | KY302543 | KY302605 | KY264106  |
| <i>Evacanthus bistigmanus</i>    | Evacanthini | WY148 | KY302410 | KY302475 | KY302544 | KY302606 | KY264107  |
| <i>Onukia connexia</i>           | Evacanthini | WY155 | KY302411 | KY302476 | KY302545 | KY302607 | KY264108  |

\* Numbers indicate sequences were obtained from GenBank, - indicates no sequence available.

**Supplementary Table S2.** PCR primers used in this study.

| Primer Name | Primer sequence (5'-3')    | Primer source          |
|-------------|----------------------------|------------------------|
| LCO1490     | GGTCAACAAATCATAAAGATATTGG  | (Hebert et al., 2004)  |
| HCO2198     | TAAACTTCAGGGTGACCAAAAAATCA | (Hebert et al., 2004)  |
| tRWF1_t1*   | AAACTAATARCCTTCAAAG        | (Park et al., 2011)    |
| tRWF2_t1*   | AAACTAATAATYTTCAAATTA      | (Park et al., 2011)    |
| 28SD2F      | AGTCGKGTGCTTGAKAGTGCAG     | Dietrich et al. (2001) |
| 28SD2R      | TTCGGGTCCCAACGTGTACG       | Dietrich et al. (2001) |
| HexAF       | ATGGCTCGTACCAAGCAGACGGC    | Ogden & Whiting (2003) |
| HexAR       | ATATCCTTGGGCATGATGGTGAC    | Ogden & Whiting (2003) |
| H3F2        | AAGCAGACGGCTCGTAAATC       | New design             |
| H3R2        | ATGATGGTGACYCGYTTGGC       | New design             |
| 28SD9-D10F  | GTAGCCAAATGCCTCGTCA        | Dietrich et al. (2001) |
| 29SD9-D10R  | CACAATGATAGGAAGAGCC        | Dietrich et al. (2001) |
| Wg1aF       | GARTGYAARTGYCAYGGYATGTCTGG | Cryan et al., 2001     |
| WgDelR1R    | GTCCTGTARCCRCGKCCACAACACAT | Urban & Cryan, 2007    |

\*: two primers combined in cocktail primer, C-tRWF.

The primer source references can be found in the text.



**Supplementary Table S3.** Morphological data matrix used in phylogenetic analysis

|                                  | 1 – 10              | 11 – 20             | 21 – 30             | 31 – 40             | 41 – 50             | 51 – 60               | 61 – 70             | 71 – 80             | 81 – 90             | 91 – 100            |
|----------------------------------|---------------------|---------------------|---------------------|---------------------|---------------------|-----------------------|---------------------|---------------------|---------------------|---------------------|
| <i>Fieberiella flori</i>         | 0 0 0 0 4 0 1 0 0 ? | 1 1 0 ? 0 0 ? 0 0 0 | 1 2 0 0 0 1 0 1 0 0 | 0 1 1 2 1 0 0 0 0 0 | 0 1 0 2 0 1 0 1 1 1 | 1 1 0 0 2 1 1 1 0 0   | 1 0 0 0 0 0 0 0 1 0 | 3 0 0 1 0 0 0 0 0 1 | 0 0 2 0 0 0 0 1 0 1 | 3 0 0 1 1 0 0 0 0 0 |
| <i>Flatfronta pronga</i>         | 0 0 0 0 4 0 1 0 0 ? | 1 0 0 ? 0 0 ? 0 0 0 | 1 2 0 0 0 2 0 1 0 0 | 2 1 0 2 1 1 0 0 0 0 | 0 1 0 1 0 0 0 1 1 2 | 0 1 0 0 2 0 1 1 0 0   | 1 0 0 0 0 0 1 0 1 0 | 3 1 0 0 0 0 0 0 2 1 | 0 0 2 0 1 1 0 0 0 0 | 0 0 0 1 1 0 0 0 0 0 |
| <i>Neohecalus magnificus</i>     | 0 0 2 0 4 0 1 0 0 ? | 1 1 0 ? 0 0 ? 0 0 0 | 1 2 0 0 0 1 0 1 0 1 | 0 1 1 2 1 1 0 0 0 0 | 0 1 0 0 0 1 0 0 1 1 | 0 1 1 0 2 0 1 1 0 0   | 1 0 0 0 0 0 0 0 2 0 | 0 ? 0 0 0 0 0 0 2 1 | 0 0 2 0 0 2 0 0 0 1 | 3 1 0 1 1 0 0 2 0 1 |
| <i>Homalodisca lacerta</i>       | 1 1 1 1 4 1 1 0 0 ? | 0 ? 0 ? 0 0 ? 0 0 0 | 2 0 2 0 2 1 0 2 0 1 | 1 0 1 0 0 0 1 0 0 0 | 1 1 0 1 1 1 0 1 0 2 | 0 2 0 1 1 0 0 0 0 0   | 1 1 2 1 0 0 0 1 0 0 | 0 ? 1 0 0 0 0 0 0 0 | 0 0 2 0 0 0 0 0 0 1 | 1 1 1 1 1 0 0 0 0 1 |
| <i>Graphocephala collinae</i>    | 0 1 1 1 4 0 0 0 0 ? | 0 ? 0 ? 0 0 ? 0 0 0 | 2 0 2 0 1 1 0 2 0 1 | 0 0 1 0 0 0 1 0 0 0 | 1 1 0 1 1 1 0 1 0 1 | 0 2 0 0 0 0 0 0 0 0   | 1 1 1 1 0 0 1 0 1 0 | 0 ? 1 0 0 0 0 0 2 0 | 0 0 1 0 0 0 0 0 0 1 | 1 0 0 1 1 0 0 0 0 1 |
| <i>Equeefa castlenau</i>         | 1 1 0 3 4 0 0 0 0 ? | 0 ? 0 ? 0 0 ? 0 1 0 | 1 1 0 1 0 0 0 1 0 1 | 0 1 1 0 1 0 1 0 1 0 | 1 1 0 2 0 0 0 1 1 0 | 0 0 0 0 2 0 0 0 0 0   | 1 0 2 0 0 0 1 1 0 1 | 0 ? 0 0 0 1 0 0 0 2 | 0 0 1 0 0 0 0 2 0 1 | 2 1 0 1 0 0 2 2 0 0 |
| <i>Coelidia</i> sp.              | 1 1 0 2 3 1 0 0 1 2 | 1 1 0 1 0 0 0 0 0 0 | 2 1 0 1 0 0 0 1 0 1 | 1 1 1 2 1 0 0 0 1 0 | 1 2 0 1 1 0 0 0 0 1 | 0 2 0 0 2 1 0 0 0 0   | 1 0 0 0 0 0 2 0 0 1 | 3 0 0 0 0 1 0 0 ? 2 | 0 0 2 0 1 0 0 2 1 0 | 0 1 0 1 0 0 2 0 0 0 |
| <i>Neocoelidia tumidifrons</i>   | 0 1 2 2 0 0 0 0 0 ? | 0 ? 0 ? 0 0 ? 0 0 0 | 1 2 1 0 2 1 1 1 0 0 | 0 1 1 1 1 2 1 0 0 0 | 1 1 0 2 1 0 0 0 0 0 | 1 1 0 0 2 1 1 0 0 0   | 1 0 0 0 0 0 0 0 0 1 | 1 0 0 0 0 0 1 1 2 3 | 0 0 1 0 1 2 0 0 0 0 | 0 1 0 1 1 0 0 0 0 0 |
| <i>Jikradia olitoria</i>         | 1 1 1 2 3 0 0 0 0 ? | 0 ? 0 ? 0 0 ? 0 1 0 | 1 2 1 1 1 0 0 1 2 1 | 0 1 1 2 1 0 1 0 1 0 | 1 1 0 1 1 0 0 0 0 1 | 0 2 0 0 2 1 0 0 0 0   | 1 0 0 0 0 0 1 0 2 1 | 3 0 0 1 0 1 0 0 1 2 | 1 0 2 0 1 0 0 2 0 0 | 0 1 0 1 0 0 0 2 0 0 |
| <i>Ilyapa viridis</i>            | 0 0 0 0 4 0 1 0 0 ? | 0 ? 0 ? 0 0 ? 0 0 0 | 1 0 2 0 1 2 0 2 0 1 | 1 0 1 0 0 1 0 0 0 0 | 0 1 0 2 1 1 1 2 1 2 | 0 1 0 0 2 0 0 1 0 0   | 1 1 1 1 0 0 1 1 2 0 | 2 0 0 0 1 1 0 0 1 2 | 0 1 1 1 0 2 0 0 0 0 | 3 1 0 1 1 0 0 2 0 1 |
| <i>Phlogis</i> sp.               | 1 1 ? 2 4 0 0 0 0 ? | 0 ? 0 ? 0 0 ? 0 0 0 | 2 0 1 0 2 2 0 1 0 0 | 0 0 1 0 0 1 1 1 0 1 | 1 2 0 1 1 1 0 0 0 1 | 0 2 0 0 2 0 1 0 0 0   | 0 0 3 ? 1 0 1 0 0 0 | 0 ? 0 0 0 0 0 0 0 2 | 0 ? ? 0 1 0 0 1 3 1 | 1 0 0 1 2 0 0 0 0 0 |
| <i>Signoretia</i> sp.            | 0 1 ? 3 0 2 0 0 1 0 | 1 1 0 ? 0 0 ? 0 0 0 | 2 2 0 0 2 1 0 1 2 1 | 0 0 1 0 0 0 1 1 0 1 | 0 2 0 0 1 0 0 0 0 1 | 0 1 0 0 2 0 1 0 0 0   | 0 1 3 ? 0 0 1 0 0 0 | 3 1 0 1 0 0 0 0 0 2 | 0 0 1 0 1 1 0 1 0 0 | 0 0 0 1 2 0 0 0 1 1 |
| <i>Alebra albostriella</i>       | 0 1 0 1 4 0 0 0 0 ? | 0 ? 0 ? 0 0 ? 0 0 0 | 0 ? ? 1 2 1 0 1 0 1 | 0 1 0 1 0 0 1 0 0 0 | 0 1 0 0 0 0 0 0 0 0 | 0 0 0 2 0 0 0 1 2 0   | 0 0 1 0 1 0 3 ? 0 0 | 3 0 0 1 0 1 0 0 1 2 | 0 1 0 0 1 0 0 0 0 1 | 1 0 0 1 0 0 0 0 0 0 |
| <i>Empoasca fabae</i>            | 0 1 0 1 4 0 0 0 0 ? | 0 ? 0 ? 0 0 ? 0 0 0 | 1 2 1 1 2 0 0 1 0 0 | 0 1 0 1 0 0 1 0 0 0 | 0 1 0 0 0 0 0 0 0 0 | 1 0 0 2 0 0 0 1 0 0   | 0 0 1 0 1 0 3 ? 0 0 | 0 ? 0 1 0 1 0 0 1 2 | 0 1 0 0 1 0 0 0 0 0 | 3 1 0 1 1 0 0 0 0 0 |
| <i>Pentoffia</i> sp.             | 0 1 1 2 3 0 2 0 0 ? | 1 2 0 ? 0 1 ? 0 2 0 | 0 ? ? 0 1 1 0 1 1 1 | 0 0 1 1 0 1 0 0 0 0 | 1 1 0 2 1 0 0 2 0 1 | 0 1 0 0 2 0 1 0 2 0   | 1 0 1 0 1 0 1 0 1 0 | 0 ? 1 0 0 1 0 0 0 2 | 0 1 1 1 0 1 1 0 0 1 | 1 1 0 1 1 0 1 2 0 0 |
| <i>Balbilus</i> sp.              | 1 0 1 2 0 0 0 0 0 1 | 1 2 1 ? 0 1 ? 0 1 1 | 1 1 2 0 2 2 0 2 0 0 | 2 0 1 1 0 2 0 0 0 0 | 0 1 0 2 0 0 0 1 0 0 | 0 1 0 0 2 0 1 0 0 1   | 1 0 2 1 0 0 1 0 2 0 | 0 ? 0 0 0 1 0 0 3 2 | 0 0 2 1 0 0 0 0 0 0 | 0 0 0 1 0 1 0 2 0 0 |
| <i>Stenotortor</i> sp.           | 1 0 1 2 0 0 0 0 0 1 | 1 2 1 ? 0 0 ? 0 1 1 | 1 1 2 0 2 2 0 1 0 0 | 2 0 1 1 0 2 0 0 0 0 | 0 1 0 2 0 0 0 1 0 0 | 0 1 0 0 2 0 1 0 0 1   | 1 0 2 1 0 0 1 0 2 0 | 0 ? 0 0 0 1 0 0 0 2 | 0 0 2 1 0 2 0 1 0 0 | 0 0 0 1 0 1 0 2 0 0 |
| <i>Friscanus friscanus</i>       | 1 1 1 0 4 0 1 0 0 ? | 0 ? 0 ? 0 0 ? 0 2 0 | 1 1 2 0 1 1 0 2 0 1 | 0 0 1 0 0 0 1 0 0 0 | 1 1 0 1 0 0 0 1 0 0 | 1 1 0 0 2 0 1 0 2 0   | 1 0 1 0 0 0 0 0 0 0 | 3 0 0 0 0 1 0 0 3 2 | 0 1 0 1 0 0 0 0 2 1 | 2 0 0 1 1 0 0 0 0 0 |
| <i>Striatanus dentatus</i>       | 1 1 3 2 2 2 2 0 1 2 | 1 2 0 0 0 0 0 2 2 0 | 1 1 2 0 0 1 0 1 2 1 | 0 0 1 0 0 0 1 0 0 0 | 1 2 0 1 0 0 0 0 0 1 | 0 1 0 1 2 0 1 0 0 0   | 1 0 1 1 0 0 1 1 0 0 | 3 0 0 0 0 1 0 0 1 2 | 0 1 0 1 0 0 2 2 1 1 | 1 1 0 1 0 1 0 0 0 0 |
| <i>Evacanthus nigramericanus</i> | 1 1 1 2 1 1 0 0 1 0 | 1 1 0 0 0 1 0 1 0 0 | 1 1 1 0 0 1 0 1 2 1 | 3 0 1 0 0 0 1 0 0 0 | 1 2 0 1 0 0 0 2 1 0 | 0 1 0 0 2 0 1 0 0 0   | 1 0 ? 1 0 0 1 0 0 0 | 3 0 0 0 0 1 0 0 1 2 | 0 0 1 0 0 2 2 1 3 1 | 1 0 0 1 0 1 0 0 0 0 |
| <i>Evacanthus stigmatus</i>      | 0 1 1 2 0 1 0 0 1 0 | 1 1 0 0 0 1 0 1 0 0 | 1 1 1 0 0 1 0 1 2 1 | 3 0 1 0 0 0 1 0 0 0 | 1 2 0 2 ? ? 0 2 0 1 | 0 1 0 0 2 0 1 0 0 0   | 1 0 ? 1 0 0 1 0 0 0 | 3 0 0 1 0 1 0 0 1 2 | 0 0 1 0 0 2 2 1 1 1 | 1 0 0 1 0 1 0 0 0 0 |
| <i>Evacanthus heimianus</i>      | 1 1 1 2 1 1 0 0 1 1 | 1 1 0 0 0 1 0 1 0 0 | 1 1 1 0 0 1 0 1 2 1 | 3 0 1 0 0 0 1 0 0 0 | 1 1 0 1 0 0 0 2 0 1 | 0 1 0 0 2 0 1 0 0 0   | 1 0 ? 1 0 0 1 0 0 0 | 3 0 0 0 0 1 0 0 1 2 | 0 0 1 0 0 2 2 1 1 1 | 1 0 0 1 0 1 0 0 0 0 |
| <i>Angustella nigricarina</i>    | 1 1 1 2 1 1 1 0 1 1 | 1 1 1 1 0 0 1 0 0 0 | 1 1 1 0 0 1 0 1 2 1 | 0 0 1 0 0 0 1 0 0 0 | 1 1 0 1 0 0 0 2 0 1 | 0 1 0 0 2 1 1 0 1 0   | 1 0 1 1 0 0 1 1 0 0 | 2 0 0 0 0 1 0 0 1 2 | 0 0 1 0 0 2 2 1 2 1 | 1 0 0 1 0 1 0 0 0 0 |
| <i>Carinata ganga</i>            | 0 1 1 2 1 0 1 0 1 1 | 1 1 1 1 0 0 1 0 1 0 | 1 1 1 0 0 1 0 1 2 1 | 0 0 1 0 0 0 1 0 0 0 | 1 1 0 1 0 0 0 2 0 1 | 0 1 0 0 2 0 1 0 1 0   | 1 0 1 1 0 0 1 1 0 0 | 3 1 0 0 0 1 0 0 2 2 | 0 0 1 1 0 0 1 0 3 1 | 2 0 0 1 0 1 0 0 0 0 |
| <i>Diramus khaohus</i>           | 1 1 1 2 1 1 1 0 1 1 | 1 1 1 1 0 0 1 0 0 0 | 1 1 1 0 0 1 0 1 2 1 | 0 0 1 0 0 0 1 0 0 0 | 1 1 0 1 0 0 0 0 0 1 | 0 1 0 0 2 1 1 0 1 0   | 1 0 1 1 0 0 1 1 0 0 | 2 0 0 1 0 1 0 0 1 2 | 0 0 1 0 0 1 1 1 1 1 | 1 1 0 1 0 1 0 0 0 0 |
| <i>Draconirvana siamensis</i>    | 0 0 2 2 1 2 0 0 1 2 | 1 2 0 1 0 0 0 0 0 0 | 2 1 1 0 0 1 0 1 1 1 | 0 0 1 1 0 1 1 0 0 0 | 1 1 0 1 0 0 1 0 0 1 | 0 1 0 0 2 0 1 0 1 0   | 1 0 1 1 0 0 1 1 1 0 | 2 0 0 0 0 1 0 0 2 2 | 0 0 1 0 0 2 0 0 0 1 | 2 1 0 1 0 1 0 0 0 0 |
| <i>Gen.1</i> sp.                 | 1 1 1 2 1 0 1 0 1 1 | 1 1 1 1 0 0 1 0 1 0 | 1 1 1 0 0 1 0 1 2 1 | 0 0 1 0 0 0 1 0 0 0 | 1 1 0 1 0 0 0 0 0 1 | 0 1 2 0 2 0 1 0 1 0 1 | 0 1 1 0 0 1 1 0 0 3 | 0 0 0 0 1 0 0 1 2 0 | 2 1 0 0 1 1 0 1 1 1 | 0 0 1 0 1 0 0 0 0 0 |
| <i>Cunedda phaeops</i>           | 1 1 1 2 2 2 2 0 1 2 | 1 0 0 1 0 0 1 2 0 0 | 1 1 1 0 0 1 0 1 2 1 | 0 0 1 0 0 0 1 0 0 0 | 1 1 0 1 0 0 0 0 0 1 | 0 1 0 0 2 0 1 0 1 0 1 | 0 1 1 0 0 1 1 0 0 0 | ? 0 0 0 1 0 0 1 2 0 | 0 1 0 0 1 2 2 2 1 1 | 0 0 0 0 1 0 0 0 0 0 |

|                                 |            |            |            |            |            |             |            |            |            |           |
|---------------------------------|------------|------------|------------|------------|------------|-------------|------------|------------|------------|-----------|
| <i>Transvenosus signuma</i>     | 1112222012 | 1001001200 | 1110010121 | 0010001000 | 1201000001 | 01002010101 | 0110011002 | 0000100120 | 0100122211 | 000010000 |
| <i>Pagaronia grossa</i>         | 011040100? | 0?0?00?020 | 1120110201 | 0010001000 | 1102100100 | 11002010101 | 0100000000 | ?000100120 | 1010100003 | 101200000 |
| <i>Pagaronia confusa</i>        | 011040100? | 0?0?00?020 | 1120110201 | 0010001000 | 1102100100 | 11002010101 | 0100000000 | ?000100120 | 1010100003 | 101200000 |
| <i>Tahura brevis</i>            | 102040210? | 110?10?000 | 1100220111 | 1011020000 | 0000000000 | 01202110201 | 0110010200 | ?000100321 | 1010201013 | 001110100 |
| <i>Nirvana suturalis</i>        | 003140210? | 120?00?010 | 1100120111 | 1011020000 | 0001001001 | 01200010201 | 0110020201 | 1000100220 | 0000112011 | 001100100 |
| <i>Chudania emeiana</i>         | 101340100? | 110?00?000 | 1100220111 | 1011011000 | 0000001001 | 01102010201 | 0110010203 | 0010100220 | 1100101300 | 001100100 |
| <i>Concavepla</i> sp.           | 002040110? | 110?00?010 | 1100120111 | 1011020000 | 0001001001 | 01200110201 | 0110020210 | ?000100220 | 0000101011 | 101100100 |
| <i>Oniella honesta</i>          | 001200100? | 110?00?010 | 1100120111 | 1011010000 | 0001001001 | 01200110201 | 0110020210 | ?000100320 | 0100210012 | 101100100 |
| <i>Australnirvana adelaidae</i> | 002200200? | 110?00?010 | 1100220111 | 0011010000 | 0000000001 | 01102010201 | 0110010200 | ?010100021 | 1000200000 | 111100110 |
| <i>Onukia abliclypeus</i>       | 1112121012 | 1101001200 | 1110010121 | 0010001000 | 1101000001 | 01002010001 | 0110011010 | ?000100120 | 0100000211 | 000010000 |
| <i>Taperus fasciatus</i>        | 1112102011 | 1111001010 | 1120010121 | 0010001000 | 1101000001 | 01002010101 | 0110011200 | ?000100220 | 0100122211 | 001010000 |
| <i>Pythamus hainanensis</i>     | 1122222012 | 1200010020 | 1120010121 | 0010011000 | 1101000001 | 01002010101 | 0110011000 | ?000100120 | 0100121011 | 001010000 |
| <i>Vangama picea</i>            | 1132222012 | 1200010220 | 1120010121 | 0010001000 | 1101000001 | 01012010001 | 0110011000 | ?011100120 | 1100100300 | 001010000 |
| <i>Paraythamus suiyangensis</i> | 1112222012 | 1111001200 | 1110010121 | 0010001000 | 1201000101 | 01002010001 | 0110011000 | ?000100220 | 0100111012 | 101010000 |
| <i>Subulatus</i> sp.            | 1102121012 | 1101001000 | 1110010121 | 0010001000 | 1101000001 | 01002010001 | 0110011102 | 0000100120 | 0100102011 | 001010000 |
| <i>Paraonukia wangmoensis</i>   | 1112112012 | 1101000010 | 1120010121 | 0010000000 | 1101000001 | 01202110101 | 0110011011 | 1000100220 | 1000110311 | 001010000 |
| <i>Risefronta albicincta</i>    | 1112101012 | 1111010100 | 1110010121 | 0010001000 | 1101000001 | 01002010101 | 0110011202 | 0000100120 | 0000122211 | 000010000 |
| <i>Bundera trimaculata</i>      | 1112111011 | 1111000210 | 1110010121 | 0010001000 | 1101000001 | 01002010001 | 0110011000 | ?000100120 | 0100110211 | 000010000 |
| <i>Bundera emeiana</i>          | 1112101011 | 1111010100 | 1110010121 | 0010001000 | 1101000001 | 01002110101 | 0110011000 | ?000100120 | 0100022211 | 000010000 |
| <i>Concavocorona Supercilia</i> | 1102121012 | 1200010120 | 1120010121 | 0010001000 | 1101000001 | 01002010001 | 0110011002 | 0000100120 | 0100122211 | 000010000 |
| <i>Gen.2</i> sp.                | 1112222012 | 1011000200 | 1110010121 | 0010002000 | 1201000001 | 01002010001 | 0110011000 | ?000100120 | 0000122211 | 000010000 |
| <i>Boundarus trimaculatus</i>   | 0112010010 | 1000010110 | 1110010121 | 0010001000 | 1102000110 | 01002020101 | 0110011000 | ?000100120 | 0000111011 | 101010000 |
| <i>Convexana rugosa</i>         | 1112112011 | 1111000010 | 1110010121 | 0010001000 | 1101000001 | 01002010101 | 0110011000 | ?000100220 | 1010121111 | 001010000 |
| <i>Mediporus splendens</i>      | 0122221012 | 1101001000 | 1120010121 | 0010001000 | 1101000101 | 01202010101 | 0110011002 | 0000100120 | 0100110200 | 001010000 |
| <i>Carinata flaviscutata</i>    | 1112101011 | 1111001010 | 1110010121 | 0010001000 | 1101000101 | 01002010101 | 0110011003 | 0000100220 | 1010100011 | 001010000 |
| <i>Convexana nigrifrons</i>     | 1112111011 | 1111001010 | 1110010121 | 0010001000 | 1101000101 | 01002010101 | 0110011000 | ?000100220 | 1010122211 | 001010000 |
| <i>Riseveinus sinensis</i>      | 1132222012 | 1200000220 | 1120010121 | 0010001000 | 1201000001 | 01012010001 | 0110011000 | ?000100120 | 1010121311 | 001010000 |
| <i>Processus bifasciatus</i>    | 1112101011 | 1111001010 | 1110010121 | 0010001000 | 1101000001 | 01002120101 | 0110011002 | 1000100220 | 0110111111 | 101010000 |
| <i>Onukia muirii</i>            | 0122101011 | 1101001000 | 1110010121 | 0010001000 | 1101000001 | 01002010101 | 0110011000 | ?000100220 | 1000121211 | 001010000 |
| <i>Paraonukia ochra</i>         | 0112111011 | 1111001010 | 1110010121 | 0010001000 | 1101010001 | 01002010101 | 0110011000 | ?000100220 | 1110121312 | 101010000 |
| <i>Onukia flavimacula</i>       | 1122112012 | 1101001110 | 1120010121 | 0010001000 | 1101000001 | 01102110101 | 0110011000 | ?000100220 | 0100011211 | 000010000 |

|                                  |            |            |            |            |            |             |            |            |            |           |
|----------------------------------|------------|------------|------------|------------|------------|-------------|------------|------------|------------|-----------|
| <i>Onukiades formosanus</i>      | 0112111011 | 1111001010 | 1110010121 | 0010001000 | 1101000001 | 01002010101 | 0110011100 | ?000100220 | 0200010012 | 101010000 |
| <i>Multiformis</i> sp.           | 1102111012 | 1011001200 | 1110010121 | 0010001000 | 1101000101 | 01002010001 | 0110011000 | ?000100220 | 0110121311 | 001010000 |
| <i>Pythochandra bilobatus</i>    | 1112222012 | 1111000210 | 1110010121 | 0010001000 | 1101000001 | 01002010101 | 1110011003 | 0000100120 | 1000122211 | 000010000 |
| <i>Shortcrowna flavocapitata</i> | 1102120011 | 1111000100 | 1110010121 | 0010001000 | 1101000001 | 01002010001 | 0100011000 | ?000100120 | 1010100011 | 001010000 |
| <i>Evacanthus bistigmanus</i>    | 1112111011 | 1111011100 | 1110010121 | 0010001000 | 1101010101 | 01002120101 | 0110011003 | 1000100220 | 0100122011 | 001010000 |
| <i>Onukia connexia</i>           | 1112101011 | 1111001010 | 1110010120 | 0010001000 | 1101000001 | 01002010101 | 0110011000 | ?000100220 | 0000122011 | 101010000 |
| <i>Epiacanthus semifuscus</i>    | 010041100? | 0?0?00?020 | 1120010111 | 0010001000 | 1101100001 | 01002010101 | 0100000003 | 1000100220 | 1010100300 | 201200000 |
| <i>Ophiuchus</i> sp.             | 001141110? | 120?00?010 | 1100120111 | 1011010000 | 0001001111 | 01200010201 | 0110020200 | ?000100220 | 0000110000 | 111100100 |
| <i>Sophonia</i> sp.              | 003141210? | 120?10?020 | 1100120111 | 1011020000 | 0001001001 | 01300010201 | 0110020200 | ?000100220 | 0000110101 | 001100100 |
| <i>Sophonia rosea</i>            | 001200100? | 110?00?010 | 1100120111 | 1011010000 | 0001001001 | 01300010201 | 0110020210 | ?000100220 | 0000200011 | 001100100 |
| <i>Convexfronta guoi</i>         | 001040100? | 110?00?010 | 1100120111 | 1011010000 | 0001001101 | 01302010201 | 0110020203 | 0000100220 | 0110020101 | 001100100 |
| <i>Antillonirvana freytagi</i>   | 002141110? | 120?00?100 | 1100120111 | 1011010000 | 0000001001 | 01202110201 | 0111020210 | ?000100320 | 1010022003 | 221110100 |
| <i>Jassosqualus smithii</i>      | 102200200? | 110?00?110 | 1100120111 | 1011010000 | 0000001001 | 01102110201 | 0111020213 | 1000100320 | 1010022000 | 221110100 |
| <i>Kana</i> sp.                  | 001040110? | 110?00?000 | 1100120111 | 1011020000 | 0000001001 | 01002010201 | 0110020213 | 0000100220 | 0100010200 | 111100100 |
| <i>Yaoundea semela</i>           | 003040210? | 110?00?000 | 1100120111 | 1011020000 | 0000001001 | 01002010201 | 0110020213 | 0000100220 | 0100010200 | 111100100 |
| <i>Decursusnirvana excelsa</i>   | 101140100? | 100?00?010 | 1100120111 | 1010000000 | 0000001100 | 01002110201 | 0110020203 | 0000100220 | 1100200000 | 101100100 |
| <i>Sophonia orientalis</i>       | 003040210? | 110?00?010 | 1100120111 | 1011020000 | 0001001011 | 01200010201 | 0110020203 | 1000100220 | 1100111011 | 101100100 |
| <i>Kosasia trpica</i>            | 003200200? | 120?00?020 | 1100120111 | 0011020000 | 0011001201 | 01300010201 | 1110000203 | 1000100220 | 1100111011 | 101000100 |
| <i>Neonirvana</i> sp.            | 002040010? | 110?00?010 | 1100120111 | 0011010000 | 0001101001 | 01002010201 | 0110110203 | 1100100321 | 0100000003 | 111200100 |
| <i>Kasunga</i> sp.               | 002040210? | 110?00?010 | 1100120111 | 1011020000 | 0011001011 | 01300010201 | 0110020203 | 1000100220 | 1100111011 | 101000100 |
| <i>Tortor</i> sp.                | 001140000? | 110?00?000 | 1100120111 | 1011000000 | 0001001001 | 01002010201 | 0110000213 | 1000100220 | 1110011003 | 101100100 |
| <i>Narecho</i> sp.               | 002210200? | 120?00?020 | 1100120111 | 0011010000 | 0000101001 | 01002010201 | 0110010201 | 0000100320 | 1110021211 | 001110000 |
